## **Human genome-edited hematopoietic stem cells phenotypically correct Mucopolysaccharidosis type I**

Natalia Gomez-Ospina<sup>1\*</sup>, Sam Glynne Scharenberg<sup>2</sup>, Nathalie Mostrel<sup>2</sup>, Rasmus O. Bak<sup>3</sup>, Sruthi Mantri<sup>2</sup>, Rolen M. Quadros<sup>4</sup>, Channabasavaiah B. Gurumurthy<sup>4,5</sup>, Ciaran Lee<sup>6</sup>, Gang Bao<sup>6</sup>, Laure Aurelian<sup>7,8</sup>, Matthew H. Porteus<sup>2\*</sup>.

<sup>1</sup>Division of Medical Genetics, Stanford University School of Medicine, Stanford, CA, USA.

<sup>2</sup>Division of Stem Cell Transplantation and Regenerative Medicine, Stanford University School of Medicine, Palo Alto, CA, USA.

<sup>3</sup>Department of Biomedicine, Aarhus University, DK-8000 Aarhus C., Denmark.

<sup>4</sup>Mouse Genome Engineering Core Facility, Vice Chancellor for Research Office, University of Nebraska Medical Center, Omaha, Nebraska

<sup>4,5</sup>Developmental Neuroscience, Munroe Meyer Institute for Genetics and Rehabilitation, of University of Nebraska Medical Center, Omaha, Nebraska

<sup>6</sup>Department of Biomedical Engineering, Georgia Institute of Technology and Emory University, Atlanta, Georgia, USA.

<sup>7</sup>Stanford University School of Medicine, Stanford, CA 94305

<sup>8</sup>University of Maryland School of Medicine, Baltimore, MD 21201

\* Corresponding author: [mporteus@stanford.edu](mailto:mporteus@stanford.edu) and [gomezosp@stanford.edu](mailto:gomezosp@stanford.edu)

## 1 **Summary**

2 Lysosomal enzyme deficiencies comprise a large group of genetic disorders that generally lack  
3 effective treatments. A potential treatment approach is to engineer the patient's own hematopoietic  
4 system to express high levels of the deficient enzyme, thereby correcting the biochemical defect  
5 and halting disease progression. Here, we present an efficient *ex vivo* genome editing approach  
6 using CRISPR/Cas9 that targets the lysosomal enzyme iduronidase to the *CCR5* safe harbor locus  
7 in human CD34+ hematopoietic stem and progenitor cells. The modified cells secrete supra-  
8 endogenous enzyme levels, maintain long-term repopulation and multi-lineage differentiation  
9 potential, and can correct biochemical and phenotypic abnormalities in an immunocompromised  
10 mouse model of Mucopolysaccharidosis type I. Our studies provide support for the development  
11 of human, genome-edited CD34+ hematopoietic stem and progenitor cells for the treatment of a  
12 multi-systemic lysosomal storage disorder. Our safe harbor approach constitutes a flexible  
13 platform for the expression of lysosomal enzymes, exemplifying a potential new paradigm for the  
14 treatment of these diseases.

## 15 **Introduction**

16 Lysosomal storage diseases (LSDs) comprise a large group of genetic disorders caused by  
17 deficiencies in lysosomal proteins; many lack effective treatments. Mucopolysaccharidosis type I  
18 (MPSI) is a common LSD caused by insufficient iduronidase (IDUA) activity that results in  
19 glycosaminoglycan (GAG) accumulation and progressive multi-systemic deterioration that  
20 severely affects the neurological and musculoskeletal systems<sup>1</sup>. Current interventions for MPSI  
21 include enzyme replacement therapy (ERT) and allogeneic hematopoietic stem cell transplantation  
22 (allo-HSCT); both have limited efficacy. ERT does not cross the blood-brain barrier, requires  
23 costly life-long infusions, and inhibitory antibodies can further decrease enzyme bioavailability<sup>2</sup>.  
24 Allo-HSCT results in better outcomes than ERT by providing a persistent source of enzyme and  
25 tissue macrophages that can migrate into affected organs, including the brain, to deliver local  
26 enzyme<sup>3-5</sup>. However, allo-HSCT has significant limitations, including the uncertain availability of  
27 suitable donors, delay in treatment (allowing for irreversible progression), and transplant-  
28 associated morbidity and mortality such as graft-versus-host disease and drug-induced  
29 immunosuppression.

30 Human and animal studies in MPSI have shown that the therapeutic efficacy of HSCT can be  
31 enhanced by increasing the levels of circulating IDUA. In humans, patients transplanted with non-  
32 carrier donors had better clinical responses than patients transplanted with HSPCs from MPSI  
33 heterozygotes with decreased enzyme expression<sup>6</sup>. In mice, transplantation of virally transduced  
34 murine hematopoietic stem and progenitor cells (HSPCs) expressing supra-normal enzyme  
35 levels<sup>7,8</sup> dramatically corrected the phenotype. Based on this, autologous transplantation of  
36 lentivirus-transduced HSPCs overexpressing lysosomal enzymes is being explored in human trials  
37 for LSDs<sup>9</sup> (ClinicalTrials.gov, NCT03488394). This autologous approach eliminates the need to  
38 find immunologically matched donors and minimizes many of the potential complications from  
39 allogeneic transplants. However, concerns remain about the potential for tumorigenicity associated  
40 with random insertion of the viral genomes<sup>10,11</sup>, carry-over of infectious particles<sup>12</sup>, the immune  
41 response to some of the vectors, and variable transgene expression<sup>13</sup>.

42 Recently developed genome editing tools combine precise gene addition with genetic alterations  
43 that can add therapeutic benefit<sup>14</sup>. Among these, Clustered Regularly Interspaced Short  
44 Palindromic Repeats-associated protein-9 nuclease (CRISPR/Cas9) is the simplest to engineer and  
45 has been used to successfully modify HSPCs in culture<sup>15</sup>. The system was repurposed for editing  
46 eukaryotic cells by delivering the Cas9 nuclease, and a short guide RNA (sgRNA). When targeted  
47 to the sequence determined by the sgRNA, Cas9 creates a double-stranded DNA break, thereby  
48 stimulating homologous recombination with a designed donor DNA template that contains the  
49 desired genetic modification embedded between homology arms centered at the break site. This  
50 process, termed “homologous recombination-mediated genome editing” (HR-GE) is most often  
51 used for in-situ gene correction and has been hailed as a tool to treat monogenic diseases. Although  
52 its therapeutic potential in LSDs is unknown, to maximize therapeutic correction by autologous  
53 transplantation of genetically modified HSPCs in LSDs, functional enzymes must be expressed at  
54 higher-than-endogenous levels. This can be achieved by inserting an expression cassette  
55 (exogenous promoter-gene of interest) into non-essential genomic region (or “safe harbor”). A safe  
56 harbor provides a platform that is independent of specific patient mutations, is easily adaptable to  
57 various lysosomal enzymes and, compared to lentiviral transduction, ensures more predictable and  
58 consistent transgene expression because the insertion sites are restricted (up to 2 in autosomes).

59 Herein, we describe the development of such an approach for MPSI. We use *CCR5* as the target  
60 safe harbor to insert an expression cassette to overexpress IDUA in human CD34<sup>+</sup> HPSCs and  
61 their progeny. *CCR5* is considered a non-essential gene because bi-allelic inactivation of *CCR5*  
62 (*CCR5* $\Delta$ 32) has no general detrimental impact on human health and the only known phenotypes  
63 of *CCR5* loss are resistance to HIV-1 infection and increased susceptibility to West Nile virus<sup>16</sup>.  
64 We report that human HSPCs modified using genome editing to express IDUA from the *CCR5*  
65 locus engraft and correct the biochemical, visceral, musculoskeletal, and neurologic manifestations  
66 of the disease in a new immunocompromised model of MSPI.

67

## 68 **Results**

### 69 **Efficient targeting of IDUA into the *CCR5* locus in human HSPCs**

70 To generate human CD34<sup>+</sup> HPSCs overexpressing IDUA, we used sgRNA/Cas9 ribonucleoprotein  
71 (RNP) and adeno-associated viral vector serotype six (AAV6) delivery of the homologous  
72 templates<sup>17</sup>. RNP complexes consisting of 2'-*O*-methyl 3'phosphorothioate-modified *CCR5*  
73 sgRNA<sup>18</sup> and Cas9 protein were electroporated into cord blood-derived (CB) and adult peripheral  
74 blood-derived HSPCs (PB). The efficiency of double-strand DNA break (DSB) generation by our  
75 *CCR5* RNP complex was estimated by measuring the frequency of insertions/deletions (Indel) at  
76 the predicted cut site. The mean Indel frequencies were 83%  $\pm$  in CB-HSPCs and 76%  $\pm$  8 in PB-  
77 HSPCs, consistent with a highly active sgRNA. The predominant Indel was a single A/T insertion  
78 that abrogated *CCR5* protein expression (**Extended Data Fig. 1**).

79 To achieve precise genetic modification, the templates for homologous recombination were made  
80 by inserting IDUA expression cassettes driven by the spleen focus-forming virus (SFFV) or the  
81 phosphoglycerate kinase (PGK) promoter, followed by a yellow fluorescent protein (YFP)  
82 downstream of the self-cleaving P2A peptide into the AAV vector genome. A third expression  
83 cassette containing IDUA driven by PGK but without a selection marker was also made (**Fig. 1a**).  
84 Following electroporation, CB and PB cells transduced with the SFFV-IDUA-YFP and PGK-  
85 IDUA-YFP viruses were examined for YFP fluorescence to quantify the efficiency of  
86 modification. As shown in **Figure 1b**, RNP electroporation followed by AAV6 transduction lead

87 to a marked increase in the median fluorescence intensity of the cells. In CB-derived HSPCs the  
88 mean fraction of YFP-positive cells, was  $34\% \pm 7$  and  $32\% \pm 8$  with SFFV and PGK-driven  
89 expression cassettes respectively. In PB-HSPCs, the frequencies were  $21\% \pm 5$ , and  $24\% \pm 5$  for  
90 the same AAV6 donors (**Fig. 1c**). AAV6 transduction alone showed  $<2\%$  YFP positive cells, while  
91 mock cells that underwent electroporation but not AAV transduction had no detectable  
92 fluorescence. We measured the efficiency of modification in CB and PB cells transduced with the  
93 PGK-IDUA virus lacking the reporter (PGK-IDUA) by genotyping single cell-derived colonies  
94 from colony formation assays (CFAs) (**Extended Data Fig. 2a, b**). In these cells, the frequencies  
95 of modification were  $54\% \pm 10$ , and  $44\% \pm 7$  in CB and PB-HSPCs, considerably higher than the  
96 larger, YFP-containing cassettes, suggesting that efficiency is dependent on insert size (**Fig. 1c**).  
97 Based on these targeting frequencies we conclude that our genome editing protocol is highly  
98 efficient and reproducible for human CB and PB-derived HSPCs.

99 We also characterized the genomic modifications at the *CCR5* loci, by quantifying the fraction of  
100 targeted alleles in bulk DNA preparations using droplet digital PCR (ddPCR) (**Extended Data**  
101 **Fig. 2c, d**). This data allowed us to estimate the distribution of cells with one (mono-allelic) or two  
102 (bi-allelic) alleles targeted and indicated that for the YFP constructs, 65% to 100% of the cells had  
103 mono-allelic modification (**Supplementary Data 1**). Consistent with this, genotyping of YFP-  
104 positive colonies in CFAs showed an average mono-allelic modification frequency of  $80\% \pm 7.5$   
105 (**Fig. 1d**).

106

## 107 **Enhanced IDUA secretion from edited HSPCs and HPSC-derived macrophages**

108 A central concept in our approach is that HSPCs and their progeny will secrete stable, supra-  
109 endogenous IDUA levels that can cross-correct the lysosomal defect in affected cells. Examination  
110 of modified HSPCs in culture showed that 3 days post-modification, three distinct cell populations  
111 could be discerned based on YFP expression: high/medium/low (**Fig. 2a**). YFP-high cells  
112 exhibited persistent fluorescence in culture for at least 30 days, demonstrating stable integration  
113 of the cassettes. YFP-negative cells had no detectable YFP expression at the time of selection,  
114 though 1% of cells eventually became positive. Most cells with intermediate fluorescence  
115 converted to YFP-high (80%) (**Fig. 2b**). In these cultures with mixed YFP-positive and negative

116 cells, grown under expansion conditions, the fraction of YFP-positive cells remained stable for 30  
117 days, suggesting that neither the modification, nor the overexpression of the enzyme, nor the  
118 reporter impacted the cells' proliferative potential.

119 When compared to mock-treated cells expressing endogenous IDUA levels, YFP-high cells  
120 secreted 250-fold and 25-fold more enzyme for the SFFV and PGK-driven cassettes respectively,  
121 while cell lysates expressed 600 and 50-fold more enzymatic activity (**Fig. 2c**). When YFP-high  
122 IDUA-HSPCs were co-cultured with patient-derived MPSI fibroblasts, they led to a decrease in  
123 the average area of lysosomal-associated membrane protein 1 (LAMP-1) positive specks,  
124 consistent with reduced lysosomal compartment size and cross-correction of the cellular phenotype  
125 (**Fig. 2d**). These data confirm that IDUA-HSPCs secrete supra-physiological IDUA levels and that  
126 the secreted IDUA has the post-translational modifications required for uptake into MPSI cells,  
127 thereby biochemically cross-correcting the patient derived enzyme deficient cells.

128 For IDUA-HSPCs to successfully correct biochemical abnormalities in the organs affected in  
129 MPSI, they must differentiate into monocytes that will migrate to and differentiate into tissue-  
130 resident macrophages such as microglia (brain), Kupffer cells (liver), osteoclasts (bone), and  
131 splenic macrophages to deliver the enzyme and cross-correct enzyme-deficient cells. To confirm  
132 that IDUA-HSPC could generate macrophages and that these cells can continue to produce IDUA,  
133 we differentiated these cells in culture and assayed for IDUA activity (**Supplementary Data 2**  
134 **and Fig. 2e**). These IDUA-HPSC-derived macrophages secreted 182-fold and 69-fold more IDUA  
135 for the SFFV and PGK-driven cassettes respectively than mock-cell-derived macrophages.  
136 Likewise, lysates exhibited 75-fold and 24-fold more IDUA activity (**Fig. 2f**). These data  
137 established that IDUA-HPSC can reconstitute monocyte/macrophages *in vitro* and that IDUA-  
138 HPSC-derived macrophages also exhibit enhanced IDUA expression.

139

#### 140 **Preserved repopulation and differentiation potential in IDUA-HSPCs**

141 To determine if HSPCs that have undergone genome editing can engraft *in vivo*, we performed  
142 serial engraftment studies into NOD-scid-gamma (NSG) mice. We first tested cells modified with  
143 the SFFV and PGK constructs expressing YFP, which allowed us to identify the modified cells *in*

144 *vivo*. Equal numbers of CB and PB-derived mock, YFP-negative (YFP-), and YFP-positive  
145 (YFP+) cells were transplanted intra-femorally into sub-lethally irradiated 6 to 8-week-old mice.  
146 Primary human engraftment was measured 16 weeks-post-transplantation by establishing the  
147 percent of bone marrow (BM) cells expressing both human CD45 and human leukocyte antigens  
148 (HLA-ABC) out of total mouse and human CD45+ cells (**Extended Data Figure 3b and Fig. 3a**).  
149 For the PGK-driven constructs, the median frequencies of hCD45<sup>+</sup>/HLA<sup>+</sup> cells in BM were as  
150 follows: Mock 76.25% (min-max: 46.4-95.4%), YFP- 21.5% (0.06-89.5%), YFP+ 4.3% (0.06-  
151 96%) (**Fig. 3b**). This showed a 5-fold drop in repopulation capacity in cells that underwent HR-  
152 GE (YFP+) compared to cells that did not but were also exposed to RNP, AAV transduction, and  
153 sorting (YFP-). The median frequency of human cells expressing YFP was 0.6% (0-18.5%) and  
154 95.8% (1-100%) for YFP- and YFP+ transplants respectively, confirming that edited cells had  
155 engrafted in these mice (**Fig. 3c**). Human cells were also found in the peripheral blood with  
156 frequencies of 31/3.1/1.1% in mock, YFP-, and YFP+ cells respectively (**Fig. 3b**).

157 The apparent engraftment advantage of cells that had not undergone HR-GE was also examined  
158 by transplanting bulk populations of HSPCs modified with the cassette without YFP. In two  
159 independent experiments, an initial fraction of targeted alleles of 28% (43% modified cells)  
160 declined to 5.2% and 6.5% in the engrafted cells (8 and 10% modified cells) despite big differences  
161 in human chimerism (**Fig. 3c, d**). This corresponded to a 5-fold drop in donor 1 and 4-fold drop in  
162 donor 2. Interestingly, this fall in targeted alleles showed significant variation in individual mice  
163 (2 to 10-fold). This data re-demonstrated the observed loss in engraftment potency after  
164 modification and supports the idea that the HR-GE cell population has fewer clones with long-  
165 term repopulation potential.

166 Serial transplantation is considered a gold standard to assess self-renewal capacity of HSCs. For  
167 secondary transplants, we isolated human CD34<sup>+</sup> cells from the bone marrow of primary mice and  
168 transplanted into secondary mice. YFP+ engrafted mice showed 3.9% (0.8-9.7%) median human  
169 cell chimerism, while YFP- mice showed 30.4% (7.7-48.2%) (**Fig. 3e**). YFP expression in the  
170 engrafted human cells was 0.27% (0-1.35) for YFP- cells, and 41.9% (20.8-100) for YFP+ cells  
171 (**Fig. 3f**). Similar levels of human cell chimerism were observed for the SFFV-driven constructs  
172 in serial transplants (**Extended data Fig. 4**). Collectively, the presence of YFP expressing cells at

173 16- and 32-weeks post-modification demonstrates that cells with long-term repopulation potential  
174 can be edited, albeit at lower frequencies than cells that did not undergo HR-GE.

175 To establish the modified cells' ability to differentiate into multiple hematopoietic lineages, we  
176 looked *in vitro* using colony formation assays (CFAs) and *in vivo* after engraftment in NSG mice.  
177 In CFAs, CB-derived and PB-derived YFP-expressing cells gave rise to all progenitor cells at the  
178 same frequencies as mock treated and YFP- cells, indicating that IDUA-HSPCs can proliferate  
179 and differentiate into multiple lineage progenitors in response to appropriate growth factors  
180 (**Extended data Fig. 5a, b**). *In vivo*, B, T and myeloid cells were identified using the human CD19,  
181 CD3, and CD33 markers. Compared to mock cells that demonstrated a roughly equal distribution  
182 of B and myeloid cells (1:1, CD19:CD33) 16 post-transplantation, YFP+ and YFP- cells showed  
183 skewing towards myeloid differentiation (YFP+ = 1:16, and YFP- = 1:5) (**Extended data Fig. 5c**).  
184 Subgrouping the mice based on human-cell chimerism showed that in mice with low human  
185 engraftment (< 1%), the cells exhibited myeloid skewing (72% of these mice had human myeloid  
186 cell fractions >90%). In contrast, mice with chimerism greater than 20% displayed a mean CD33+  
187 fraction of 55% (**Extended Data Fig. 5d, e**). This myeloid bias was not observed in circulating  
188 cells in the peripheral blood or in secondary transplants (**Extended data Fig. 5f, g**). These data  
189 suggest that myeloid skewing is tightly and inversely correlated with the degree of human cell  
190 engraftment, and that neither the genome editing process, nor IDUA expression, affects the  
191 modified cell's capacity to differentiate into multiple hematopoietic lineages *in vitro* or *in vivo*.

192

### 193 **Biochemical correction in NSG-IDUA<sup>X/X</sup> mice by human IDUA-HSPCs**

194 To determine the potential of human IDUA-HSPCs to correct the metabolic abnormalities of  
195 MPSI, we established a new mouse model of the disease capable of engrafting human cells. NSG-  
196 IDUA<sup>X/X</sup> mice replicated the phenotype of patients affected with MPSI<sup>1</sup> and previously described  
197 immunocompetent<sup>19,20</sup> and immunocompromised<sup>21</sup> MPSI mice (**Supplementary Data 3,**  
198 **Extended data Fig. 6 and 7**). We focused the correction experiments on cells expressing IDUA  
199 under the PGK promoter, as this promoter has better translational potential because it has  
200 decreased enhancer-like activity compared to SFFV<sup>22</sup>. As a first series of experiments, we  
201 examined PB-derived cells in which the modification did not include a selection marker. In bulk



202 transplants, the median human cell chimerism in the bone marrow was 62.2% (min=39.2,  
203 max=96.7%) and no statistically significant differences in human engraftment were observed  
204 between NSG-IDUA<sup>X/X</sup> and NSG-IDUA<sup>W/X</sup> mice (**Fig. 4a**). The editing frequencies before  
205 transplantation were 30% of *CCR5* alleles (by ddPCR) and 46% of cells (as measured by CFA).  
206 GAG urinary excretion was measured at 4, 8, and 18 weeks post-transplantation in NSG-IDUA<sup>X/X</sup>  
207 and IDUA<sup>W/X</sup> mice. Biochemical correction was detectable after 4 weeks, and the trend towards  
208 normalization increased over time (**Fig. 4b**). These kinetics are consistent with the time lag needed  
209 for the genetically engineered human HSPCs to engraft, expand, and migrate to affected tissues  
210 and “cross correct” diseased cells. At 18 weeks, NSG-IDUA<sup>X/X</sup> mice that had been transplanted  
211 with IDUA-HSPCs (X/X Tx) excreted 65% less GAGs in the urine compared to sham-treated  
212 NSG-IDUA<sup>X/X</sup> mice (X/X sham) (median Tx= 387.2 µg/mg of creatinine, sham=1,122 µg/mg)  
213 though the levels had not normalized (W/X sham =155 µg/mg) (**Fig. 4b**). Transplantation of  
214 IDUA-HSPCs also resulted in increased IDUA activity to 11.3%, 50.1%, 167.5%, and 6.8% of  
215 normal in serum, liver, spleen, and brain respectively (compared to undetectable in X/X sham) and  
216 resulted in normalization of tissue GAGs in liver and spleen (**Fig. 4c, d**). Supra-endogenous levels  
217 of activity were detected consistently in the spleen and occasionally in the liver of some mice. This  
218 can be attributed to robust human cell engraftment in these organs, as demonstrated by increases  
219 in liver and spleen size in transplanted mice regardless of genotype (**Extended Data Fig. 8b-e**).

220 Because we could not discount the contribution of unmodified cells to the observed correction in  
221 bulk transplants, we then examined the effect of HSPCs expressing IDUA and YFP under the PGK  
222 promoter after FACS. Of 15 NSG-IDUA<sup>X/X</sup> and 5 NSG-IDUA<sup>W/X</sup> 13/15 and 5/5 were deemed to  
223 have engrafted (human chimerism in the bone marrow >0.1%). The median percent human  
224 chimerism was 4.2% (W/X) and 9.9% (X/X). IDUA-YFP-HSPCs increased IDUA tissue activity  
225 to 2.9%, 7.4%, 25.5%, and 1.3% of normal in serum, liver, spleen, and brain respectively (**Fig.**  
226 **4a**). Tissue and urine GAGs were also significantly reduced (**Fig. 4f**). Together, this data indicates  
227 that IDUA-HSPCs can correct the metabolic abnormalities in MPSI and suggest that the degree of  
228 correction correlates with human cell chimerism.

229

230 **Phenotypic correction in NSG-IDUA<sup>IDUAX/X</sup> mice by human IDUA-HSPCs**

231 To investigate the effect of IDUA-HSPCs on the skeletal and neurological manifestations of MPSI,  
232 sham-treated and transplanted mice also underwent whole body micro-CT and neurobehavioral  
233 studies 18 weeks after transplantation. The effect of transplantation on the skeletal system was  
234 measured on the skull parietal and zygomatic bone thickness and the cortical thickness and length  
235 of femoral bones. In experiments where the mice were transplanted using unselected cells and  
236 where human cell chimerism was high (**Fig. 4d**), we observed almost complete normalization of  
237 bone parameters by visual inspection and on CT scan measurements (**Fig. 5a, b**). Mice transplanted  
238 with cells that had undergone selection showed partial but statistically significant reduction in the  
239 thickness of the zygomatic, parietal bones, and femur (**Fig. 5c**).

240 We also examined the open field behavior, passive inhibitory avoidance, and marble-burying  
241 behavior of sham-treated and transplanted mice. Transplantation of bulk-edited cells resulted in  
242 marked reduction in locomotor activity and long-term memory, regardless of genotype (**Extended**  
243 **Data Fig. 9a-c**). We suspected that high human-cell chimerism was detrimental for the overall  
244 health of the mice. Consistent with this, we observed growth restriction following human cell  
245 transplantation in both homozygous and heterozygous mice (**Extended Data Fig. 8a**). This likely  
246 represents a toxicity artifact of this xenogeneic transplant model and could be explained in part by  
247 the defective erythropoiesis seen in these xenograft models<sup>23</sup> when human cell chimerism is high.  
248 In contrast, NSG-IDUA<sup>X/X</sup> mice transplanted with YFP-selected cells in which human cell  
249 chimerism was low exhibited locomotor activity indistinguishable from their sham-treated  
250 heterozygous littermates, and markedly higher than the sham-treated knock-out mice (**Fig. 5d**).  
251 These mice also had increased vertical counts at all time points and demonstrated the same  
252 exploratory behavior as sham heterozygous mice (**Fig. 5e**). Transplantation of IDUA-HSPCS in  
253 NSG-IDUA<sup>X/X</sup> also enhanced performance in the passive inhibitory avoidance test 24 hours later  
254 (**Fig. 5f**). Digging and marble burying behavior also improved but did not completely normalize  
255 (**Fig. 5g**).

256

### 257 **Safety of our genome editing strategy**

258 To assess genotoxicity and characterize the off-target repertoire of our *CCR5* guide, we used the  
259 bioinformatics-based tool COSMID (CRISPR Off-target Sites with Mismatches, Insertions, and

260 Deletions)<sup>24</sup>. Off-target activity at a total of 67 predicted loci was measured by deep sequencing  
261 in two biological replicates of CB-derived HSPCs. In each replicate we compared the percent  
262 Indels measured in mock and cells electroporated with RNP with either wild-type (WT) Cas9 or a  
263 higher fidelity (HiFi) Cas9<sup>25</sup>. Five of the 67 sites were located within repetitive elements and Indel  
264 rates could not be assigned to specific loci in this group (**Extended Data Fig. 10**). For the  
265 remaining 62 genomic locations, sites were deemed true off-targets if: 1) the percent of indels at  
266 the site was > 0.1% (limit of detection), 2) off-target activity was present in both biological  
267 samples, and 3) indels were higher in the RNP compared with the mock samples. Given these  
268 criteria only 4 sites were deemed to be true off-targets (**Figure 6a, b**). For all of these sites the  
269 frequency of Indels was < 0.5% and the use of the HiFi Cas9 abolished off-target activity entirely  
270 while maintaining on-target efficiency. Only one exonic site was found in the *SUOX* gene (sulfite  
271 oxidase). The highest off-target activity measured at this site was 0.128%, which was reduced  
272 below the limit of detection with HiFi Cas9. These data suggest that our *CCR5* sgRNA combined  
273 with either WT Cas9 or especially HiFi Cas9 has negligible off-target activity on a large screen of  
274 bioinformatically predicted sites.

275 Collectively, we performed 191 autopsies (101 mice used in primary engraftment, 50 in secondary  
276 engraftment, and 40 in NSG-IDUA<sup>X/X</sup> correction studies) in which no gross tumors were found.  
277 Three tumor-like masses were evaluated by histology and confirmed to be abscesses. These 191  
278 mice were transplanted with a combined dose of 90 million human cells that underwent our  
279 genome editing protocol. Considering that the median age for HSCT in MSPI patients is around  
280 one year<sup>26</sup>, and that an average one year-old is 10 Kg, the total number of modified cells used in  
281 this study is roughly equivalent to two clinical doses of  $4.5 \times 10^6$  CD34 HSPCs/kg. We conclude  
282 that the apparent lack of tumorigenicity and the low off-target activity of the *CCR5* sgRNA provide  
283 evidence for the safety our modification strategy.

284

## 285 **Discussion**

286 We describe an efficient application of RNP and AAV6-mediated template delivery to overexpress  
287 IDUA from a safe harbor locus in human CD34+ HSPCs. The suitability for *CCR5* to be a safe  
288 harbor for the insertion and expression of therapeutic genes has been described<sup>22,27</sup>. For LSDs like  
289 MPSI, the use of the safe harbor has several advantages compared to genetic correction of the  
290 affected locus: 1) it enhances therapeutic potential, as it allows for supra-endogenous expression,  
291 2) it circumvents design for specific mutations, 3) the coding sequences can be engineered with  
292 enhanced therapeutic properties, e.g., crossing the blood brain barrier<sup>28</sup>, and 4) it is versatile and  
293 easily adaptable to other LSDs.

294 Our approach attempts to commandeer the patient's own hematopoietic system to express and  
295 deliver lysosomal enzymes. Because of the unique ability of this system to generate tissue  
296 macrophages that can migrate into affected tissues to deliver the enzyme<sup>29</sup>, an HSCT-based  
297 approach will likely be more effective than other potential enzyme depots<sup>29</sup> for harder-to-treat  
298 organs like the CNS and bone. The autologous source for this approach also improves on safety,  
299 by eliminating the morbidity of graft rejection, graft-versus-host disease, and immunosuppression,  
300 and can lead to earlier intervention by obviating the need for donor matching.

301 We studied the self-renewal and multi-lineage differentiation capacity of the modified cells to  
302 establish the potential of genome-edited HSPCs as one-time therapy for MPSI. Our data  
303 demonstrates that this approach can modify cells with long-term repopulation potential and  
304 preserves multi-lineage differentiation capacity *in vivo* and *in vitro*. In experiments comparing  
305 engraftment potential of the YFP- and YFP+ cells, as well as in bulk transplantation experiments,  
306 cells that underwent HR-GE had approximately a 5-fold lower long-term engraftment capacity.  
307 This is not entirely surprising, as HR efficiencies are higher in cycling cells<sup>30,31</sup> and therefore  
308 would be expected to be lower in stem than progenitor cells. The lower engraftment could also  
309 represent a negative effect of expression of a foreign fluorescent protein in HSCs<sup>32</sup> as previously  
310 substituting a truncated form of the low-affinity nerve growth factor receptor resulted in higher  
311 engraftment frequencies than using a fluorescent protein to mark HR-GE cells<sup>15</sup>. As observed in  
312 allo-HSCT, this engraftment challenge might be circumvented by using larger doses of genome  
313 edited cells. This can be achieved through selection followed by *in vitro* expansion in optimized

314 culturing conditions that could help maintain self-renewal capacity, perhaps including recently  
315 discovered small molecules such as UM171<sup>33</sup> and SR1<sup>34</sup>.

316 *Ex vivo* manipulation of the HSPCs allows for a thorough examination of the genotoxicity and the  
317 magnitude of biochemical potency of the cells before delivering the engineered cell drug product  
318 to patients. Through a bioinformatics-guided strategy we identified four potential off-target sites  
319 with minimal off-target activity. Fortunately, all were reversed by using a higher fidelity  
320 nuclease<sup>25</sup>. The conclusion that our genome editing strategy is safe is also supported by the lack  
321 of tumorigenicity in 191 mice transplanted with 90 million edited cells.

322 We examined the therapeutic potential of the edited HSPCs in a new model of MPSI capable of  
323 robust human cell engraftment. Engraftment of the IDUA-HPSCs led to reconstitution of enzyme  
324 activity and decreased GAG storage in multiple organs. Notably, small changes in circulating and  
325 tissue IDUA lead to significant phenotypic improvements. This is not surprising as even a small  
326 fraction of normal IDUA activity can dramatically improve the physical manifestations of MPSI.  
327 Mean IDUA activity in fibroblasts from patients with severe MPSI is 0.18% (range 0–0.6), while  
328 0.79% residual activity (range 0.3–1.8) results in mild disease (minimal neurological involvement  
329 and the possibility of a normal life span)<sup>35</sup>. In fact, healthy individuals can be found with enzymatic  
330 activity as low as 4%<sup>36</sup>. Our data constitutes the first study to show symptomatic correction of an  
331 LSD with human genome-edited HSPCs and provides support for the further development of this  
332 strategy for the treatment of the visceral, skeletal, and neurological manifestations in MPSI.

333 In sum, these pre-clinical studies provide proof-of-concept evidence of the safety and efficacy of  
334 using genome-edited human HSPCs modified to express a lysosomal enzyme to correct the  
335 biochemical, structural, and behavioral phenotype of a mouse model of MPSI, a canonical  
336 lysosomal storage disease. Moreover, this work provides specific evidence of safety and efficacy  
337 to support the optimization and development of this strategy into a clinical protocol to treat patients  
338 with MPSI and a platform approach to potentially treat other lysosomal storage disorders.

339 **Figure Legends**

340 **Fig. 1 | Efficient CRIPR/Cas9-mediated integration of IDUA overexpression cassettes into**  
341 **the *CCR5* locus in human CD34+ HSPCs.** **a**, Schematic of targeted integration of IDUA and  
342 expression cassettes. The AAV6 genome was constructed to have 500bp arms of homology  
343 centered on the cut site, and the IDUA sequence placed under the control of the SFFV or the PGK  
344 promoter. In two DNA templates, YFP was expressed downstream of IDUA using the self-  
345 cleaving P2A peptide. Analysis was performed 3-days post-modification **b**, FACS and histogram  
346 plots of mock and human HSPCs that underwent RNP and AAV6 exposure with YFP-containing  
347 expression cassettes. **c**, Targeting frequencies in CB (red) and PB (blue)-derived HSPCs read by  
348 percent fluorescent cells in YFP expressing cassettes and percent colonies with targeted *CCR5*  
349 alleles by single cell-derived colony genotyping in cassettes without the reporter. RNP+AAV6  
350 conditions with YFP templates, CB=20, PB=11. For the template without selection CB=6, PB=6.  
351 Lines indicate mean and SD. **d**, Distribution of wildtype (WT), mono and bi-allelically modified  
352 cells in YFP-positive HSPCs (n=400, 3 human donors).

353 **Fig. 2 | Enhanced IDUA expression by IDUA-HSPCs and derived macrophages.** **a**, FACS plot  
354 shows distinct populations based on YFP expression 3 days post-modification. **b**, Persistent YFP  
355 expression up to 30 days cultures. **c**, Fold increase in IDUA secretion and intracellular expression  
356 by YFP-high, YFP-low, and YFP-negative populations compared to mock cells. **d**, Average  
357 LAMP-1+ area in MPSI fibroblasts co-cultured with IDUA-HSPCs. Each dot represents a cell. **e**,  
358 Human CD34, CD14, and CD11b marker expression in HSPC-derived macrophages and human  
359 monocyte-derived macrophages after *in vitro* differentiation compared to undifferentiated cells  
360 (CD34+ HSPCs). Macrophage morphology and YFP expression after differentiation. **f**, Fold  
361 increase in IDUA secretion and intracellular expression in HSPC-macrophages modified with  
362 SFFV and PGK expression cassettes. **c, e, and f**, Each dot represents average of triplicates in a  
363 human cell donor. All data expressed as mean  $\pm$  SD, \*\*\*  $p < .001$  in two-sided unpaired t-test.

364 **Fig. 3 | IDUA-HSPCs maintain long-term repopulation capacity.** **a**, Schematic and  
365 representative FACS plots showing phenotyping by flow of human, myeloid, B-cell, and targeted  
366 cells after engraftment. **b**, Percent human cell chimerism in bone marrow (BM) and peripheral  
367 blood (PM) of mice 16-weeks post-transplant with CB (blue) and PB (red)-derived HSPCs targeted

368 with PGK cassettes; mock (n=11), YFP- (n=21), and YFP+ (n=36). Each point represents a mouse.  
369 **c**, Percent human, YFP+ cells in BM of mice in BM 16-weeks post-transplant. **d**, Percent human  
370 cell chimerism in BM in mice transplanted with bulk cells without selection with two different  
371 human cell donors. **e**, Percent modified alleles in engrafted cells by ddPCR. 30% was the starting  
372 allele modification frequency for both human donors. **f**, Percent human cell chimerism in BM of  
373 mice in secondary transplants 32 weeks after genome editing; YFP- (n=10), and YFP+ (n=10). **e**,  
374 Percent human, YFP+ cells in BM of mice in secondary transplants.

375 **Fig. 4 | Biochemical correction in NSG-IDUA<sup>X/X</sup> mice by human IDUA-HSPCs.** IDUA activity  
376 and GAG accumulation in heterozygous sham-treated (W/X sham- clear), heterozygous  
377 transplanted (W/X Tx- black), homozygous sham-treated (X/X sham- blue), and homozygous  
378 transplanted (X/X Tx- red) mice. **a**, Percent human and YFP+ cells in BM in experiments using  
379 bulk and sorted cells. **b**, Urinary GAGs at 4,8, and 18 weeks in experiments using bulk cells (n=5  
380 mice per cohort, two measurements per mouse). **c**, Serum and tissue IDUA activity in experiments  
381 using bulk cells (n=5 per cohort). **d**, Fold GAG storage in liver and spleen (normalized by W/X  
382 sham, n=5 per cohort). **e**, Serum and tissue IDUA activity in experiments using sorted cells (n=5  
383 for W/X Tx and sham mice, and n=13 for X/X Tx and sham mice). **f**, Fold GAG urinary excretion  
384 and tissue storage in experiments using sorted cells (normalized by W/X sham). Median values in  
385 all scatter plots. **d** and **f** show box plots with whiskers at the 5-95<sup>th</sup> percentiles. \*\*\*\*: p < .0001 in  
386 one-way ANOVA test. Post hoc comparisons were made with the Tukey's multiple comparisons  
387 test.

388 **Fig. 5 | Phenotypic restitution in NSG-IDUA<sup>X/X</sup> mice by human IDUA-HSPCs.** Behavioral and  
389 skeletal assessment in: W/X sham (clear or gray, n=11), X/X sham (blue, n=10), and X/X Tx (red,  
390 n=11). **a**, Representative photos showing facial features in mice transplanted with bulk cells. **b**,  
391 Bony features in mice transplanted with bulk and **c**, sorted cells. Box plots with whiskers show  
392 min and max. **d**, Ambulatory distance in mice transplanted with sorted cells. W/X sham vs. X/X  
393 sham: \*\*; W/X sham vs. X/X Tx: n.s.; X/X sham vs. X/X sham: \*. **e**, Vertical rearing in mice  
394 transplanted with sorted cells. W/X sham vs. X/X sham: \*; W/X sham vs. X/X Tx: n.s.; X/X sham  
395 vs. X/X sham: \*. **f**, Memory retention in mice transplanted with sorted cells. **g**, Quantification of  
396 digging behavior in mice transplanted with sorted cells. Data shown as mean ± SEM. **b-g**,  
397 Comparisons between groups were performed using one-way ANOVA test and post-hoc

398 comparisons were made with the Tukey's multiple comparisons test. \*:  $p < .05$ , \*\*:  $p < .01$ , \*\*\*:  
399  $p < .001$ , and \*\*\*\*:  $p < .0001$ . Open field testing and vertical rearings were analyzed using within-  
400 subject modeling by calculating the area under the curve for each mouse within the first five minutes  
401 and comparing between groups with one-way ANOVA.

402 **Fig. 6 | OFF-target analysis of the *CCR5* sgRNA.** **a**, Percent reads with Indels at 62 off-target  
403 sites predicted using COSMID. For each site, red dots indicate samples treated with WT Cas9 and  
404 blue dots indicate samples treated with HiFi Cas9. The limit of detection for NGS is 0.1% and is  
405 indicated on the graph by a dashed line. **b**, Table summarizing five bona fide off-target sites. For  
406 all of these sites the percent of Indels was  $< 0.5\%$ . For 4 of these sites, the use of the HiFi Cas9  
407 abolished off-target activity.

408

#### 409 **Extended Data**

410 **Extended Data Fig. 1 | Characterization of the *CCR5* sgRNA.** **a**, Indel frequency in CB and  
411 PB-derived cells by the RNP complex. **b**, Representative indel distribution from next generation  
412 sequencing reads. **c**, Histogram of *CCR5* protein expression in mock-treated and RNP-treated cells  
413 showing an 80% reduction in protein expression after indel induction. **d**, Sample sequence traces  
414 around the *CCR5* sgRNA sequence (gray box. PAM in red) in mock samples and RNP-treated CB-  
415 derived HSPCs showing predominant single A insertion. **e**, Summary of indels and respective  
416 frequencies by next-generation sequencing.

417 **Extended Data Fig. 2 | Efficiency of modification at the *CCR5* locus.** **a**, Schematic showing the  
418 three primer-based genotyping scheme to distinguish mono and bi-allelic integration into the  
419 *CCR5* locus on CFA-derived colonies. This strategy did not distinguish WT versus alleles with  
420 indels (NHEJ). **b**, Example agarose gels of 40 colonies genotyped in this manner. A single 1.1Kb  
421 band was interpreted as WT/NHEJ in both alleles, while a single 0.6 Kb band was read as bi-allelic  
422 integration. **c**, Schematic of probe design for ddPCR analysis. Fraction of modified alleles was  
423 obtained by using a second reference probe to the *CCRL2* gene also on chromosome 3p. **d**,  
424 Originally two probes where each straddled a 5' or 3' homology arm were designed. The accuracy  
425 of the assays was verified and compared using genomic DNA from colonies derived from mono-



426 allelic cells (0.5 fraction of alleles modified). Error bars indicate 95% CI. The 3' HA probe was  
427 selected. **e**, *CCR5* allele targeting frequencies in CB (red) and PB (blue)-derived IDUA expressing  
428 HSPCs as measured by ddPCR. The mean fraction of modified alleles in CB-HSPCs for the SFFV  
429 and PGK-driven donors was  $23\% \pm 6$ ,  $21\% \pm 8$  respectively, and  $41\% \pm 5$  for the cassette lacking  
430 YFP.

431 **Extended Data Fig. 3 | a**, Gating scheme for quantification of human CD34+, CD14+, and  
432 CD11b+ cells in human HSPCs maintained in standard CD34+ cytokine media (top panel) or  
433 media containing M-CSF to induce monocyte/macrophage differentiation (bottom panel). Single  
434 and live cell discrimination not shown. **b**, Gating scheme used to analyze human cell engraftment  
435 and cell lineages after transplantation. Representative plots for quantification of mouse and human  
436 hematopoietic (mCD45+ and hCD45+), all human (CD45+/HLA-ABC+), human B (CD19+),  
437 human myeloid (CD33+), human T (CD3+), and YFP+ cells.

438 **Extended Data Fig. 4 | IDUA-HSPCs modified with SFFV containing cassettes are capable**  
439 **of long-term repopulation and multi-lineage differentiation. a**, Percent human cell chimerism  
440 in BM and PM of mice 16-weeks post-transplant with CB-derived HSPCs. **b**, Percent YFP+ cells  
441 in BM and PB of mice in primary transplants. **c**, Percent human cell chimerism in BM of mice in  
442 secondary transplants (32 weeks). **d**, Percent YFP+ cells in BM and PB of mice in secondary  
443 transplants.

444 **Extended Data Fig. 5 | | IDUA-HSPCs maintain multi-lineage differentiation potential. a**,  
445 Representative photos showing morphology and YFP expression in CFU-GM, BFU-E, and CFU-  
446 E colonies. **b**, Colony formation unit frequency in mock, YFP- and YFP+ cells (only cells modified  
447 with PGK driven cassettes are shown). **c**, Box plot with whiskers (min to max) showing percent  
448 human CD33+ (myeloid), CD19+ (B) cell in the BM of mice transplanted with mock, and FAC-  
449 sorted YFP+ and YFP- cells in primary transplant mice. Each point represents data from a single  
450 mouse. **d**, Scatter plot from mice with human cell chimerism <1% against the percent myeloid  
451 cells. **e**, Scatter plot of human cell chimerism >20% against the percent myeloid cells. **f**, Percent  
452 human CD33+, CD19+, and CD3+ (T) cells in the PB of mice transplanted with mock, and FAC-  
453 sorted YFP+ and YFP- cells. **g**, Box plot with whiskers (min to max) showing percent human

454 CD33+ (myeloid), CD19+ (B) cell in the BM secondary transplant mice. \*\*\*\*:  $p < .0001$  in one-  
455 way ANOVA test. Post hoc comparisons were made with the Tukey's multiple comparisons test.

456 **Extended Data Fig. 6 | Biochemical characterization of NSG-IDUA<sup>X/X</sup> mice. a,** Tissue IDUA  
457 enzyme activity in tissues. **b,** Tissue GAGs measure by dimethylmethylene blue reactivity. **c,**  
458 Histological sections of paraffin-embedded tissues stained with bromophenol blue (brain) or alcian  
459 blue (liver, spleen, and heart). Brain sections on X/X mice showed distended and vacuolated  
460 Purkinje cells. In liver, spleen, and heart blue deposit-laden cells can be seen throughout. **d,** Age-  
461 related progression of urinary GAGs excretion. **e,** Survival analysis comparing NSG, W/X, and  
462 X/X during one year of observation (n=10). **f,** Physical dysmorphisms and visceral enlargement.  
463 **g,** Total body, liver, spleen and heart weight in W/X and X/X mice.

464 **Extended Data Fig. 7 | Phenotypic characterization of NSG-IDUA<sup>X/X</sup> mice. a,** Reconstructed  
465 micro-CT images of skull and zygomatic and parietal bone thickness. **b,** CT longitudinal sections  
466 of femurs, and cortical thickness, width, and length measurements. **c,** Spontaneous locomotion in  
467 open field testing. **d,** Vertical rearing counts for W/X and X/X mice during 10-minute observation  
468 in the open field chamber. **e,** Long-term memory in passive inhibitory avoidance test. **f,** Defensive  
469 digging in the marble burying task. Total 5 female mice per genotype. Data are presented as mean  
470  $\pm$  SD for **a-e**, mean  $\pm$  SEM for **f-g**. Comparisons between groups were performed using unpaired  
471 t-test. \*:  $p < .05$ , \*\*:  $p < .01$ , \*\*\*:  $p < .001$ , and \*\*\*\*:  $p < .0001$ . Open field testing was analyzed  
472 using within-subject modeling for the entire time course by calculating the area under the curve for  
473 each mouse and comparing between genotypes with a t-test.

474 **Extended Data Fig. 8 | Body and organ size in transplantation experiments using bulk IDUA-**  
475 **HSPCs. a,** Total body weight in heterozygous transplanted (W/X Tx- dark gray), heterozygous  
476 sham-treated (W/X sham- clear), homozygous transplanted (X/X Tx- red), and homozygous sham-  
477 treated (X/X Tx- blue) mice. **b,** Normalized liver weight. **c,** Normalized spleen weight. **d,**  
478 Normalized heart weight. **e,** Percent human, B (CD19+), and myeloid (CD33+) cells in the spleen  
479 of X/X Tx mice measured 18 weeks post-transplant.

480 **Extended Data Fig. 9 | Neurobehavioral studies in mice transplanted with bulk IDUA-**  
481 **HSPCs. a,** 10-minute time course of spontaneous locomotor behavior in heterozygous transplanted  
482 (W/X Tx-black), heterozygous sham-treated (W/X sham- clear or gray), homozygous transplanted

483 (X/X Tx- red), and homozygous sham-treated (X/X Tx- blue) mice. No comparison was found to  
484 be significant. **b**, Total ambulatory distance in 10 minutes. **c**, Memory for inhibitory avoidance  
485 training (24h). No comparison was found to be significant. Comparisons between groups were  
486 performed using one-way ANOVA test and post-hoc comparisons were made with the Tukey's  
487 multiple comparisons test. Open field testing and vertical rearings were analyzed using within-  
488 subject modeling by calculating the area under the curve for each mouse for the entire time course  
489 and comparing between groups with one-way ANOVA.

490 **Extended Data Fig. 10 | Comprehensive off-target site analysis of the *CCR5* sgRNA.** Table  
491 lists all 67 COSMID predicted sites, the sequence, genomic location, percent Indels in two  
492 experiments and the number of reads for each site and in each experiment. Samples with percent  
493 Indels > 0.1% are highlighted in pink. Samples with low coverage are highlighted in light yellow.  
494 *CCR5\_OT63* through 67 were located within a repetitive element. Three of these had primers that  
495 should have been unique per locus but the Indel analysis showed that this was not the case.  
496 Therefore, the true off-target rate at these sites were not ascertainable but should all be < 0.5%.

497 **Methods**

498

499 **AAV donor plasmid construction**

500 The CCR5 donor vectors have been constructed by PCR amplification of ~ 500 bp left and right  
501 homology arms for the CCR5 locus from human genomic DNA. SFFV, PGK, IDUA sequences  
502 were amplified from plasmids. Primers were designed using an online assembly tool (NEBuilder,  
503 New England Biolabs, Ipswich, MA, USA) and were ordered from Integrated DNA Technologies  
504 (IDT, San Jose, CA, USA). Fragments were Gibson-assembled into a the pAAV-MCS plasmid  
505 (Agilent Technologies, Santa Clara, CA, USA).

506

507 **rAAV production**

508 We followed a protocol that has been previously reported with slight modifications<sup>1</sup>. Briefly, HEK  
509 293 cells are transfected with a dual-plasmid transfection system: a single helper plasmid (which  
510 contains the AAV rep and cap genes and specific adenovirus helper genes) and the AAV donor  
511 vector plasmid containing the ITRs. After 2 days the cells are lysed by three rounds of freeze/thaw,  
512 and cell debris is removed by centrifugation. AAV viral particles are purified by  
513 ultracentrifugation in iodixanol gradient. Vectors are formulated by dialysis and filter sterilized.  
514 Titers are performed using droplet digital PCR. Alternatively, viruses were amplified and purified  
515 by Vigene Biosciences (Rockville, MD, USA).

516

517 **Electroporation and transduction of cells**

518 CCR5 sgRNA was purchased from TriLink BioTechnologies (San Diego, CA, USA) and was  
519 previously reported<sup>2</sup>. The sgRNA was chemically modified with three terminal nucleotides at both  
520 the 5' and 3' ends containing 2' O-Methyl 3' phosphorothioate and HPLC-purified. The genomic  
521 sgRNA target sequence (with PAM in bold) was: CCR5: 5'-  
522 GCAGCATAGTGAGCCCAGAA**GGG**-3'. Cas9 protein was purchased from Integrated DNA  
523 Technologies. RNP was complexed by mixing Cas9 with sgRNA at a molar ratio of 1:2.5 at room  
524 temperature. CD34<sup>+</sup> HSPCs were electroporated 2 days after thawing and expansion by using the  
525 Lonza Nucleofector 4D (program DZ-100) in P3 primary cell solution as follows: 10 × 10<sup>6</sup> cells/ml,  
526 300 µg/ml Cas9 protein complexed with 150 µg/ml of sgRNA, in 100 µl. Following  
527 electroporation, cells were rescued with media at 37°C after which rAAV6 was added (MOI

528 15,000 of 15,000 titrated to maximize modification efficiency and cell recovery). A mock-  
529 electroporated control was included in most experiments where cells underwent electroporation  
530 without Cas9 RNP.

531

### 532 **Quantification of putative CCR5 gRNA off-target activity by deep sequencing**

533 Potential off-target sites in the human genome (hg19) were identified and ranked using the recently  
534 developed bioinformatics program COSMID, allowing up to three base mismatches without  
535 insertions or deletions and two base mismatches with either an inserted or deleted base (bulge).  
536 The top ranked sites were further investigated. Off-target activity at a total of 67 predicted loci was  
537 measured by deep sequencing in two biological replicates of CB-derived HSPCs.  
538 Bioinformatically predicted off-target loci were amplified by two rounds of PCR to introduce  
539 adaptor and index sequences for the Illumina MiSeq platform. All amplicons were normalized,  
540 pooled and quantified using the PerfeCTa NGS quantification kit per manufacturer's instructions  
541 (Quantabio, Beverly, MA, USA). Samples were sequenced using a MiSeq Illumina using 2 x 250bp  
542 paired end reads. INDELs were quantified as previously described<sup>3</sup>.

543

### 544 **Measuring insertions at the CCR5 locus with ddPCR**

545 Genomic DNA was extracted from either bulk or sorted populations using QuickExtract DNA  
546 Extraction Solution. For droplet-digital PCR (ddPCR), droplets were generated on a QX200  
547 Droplet Generator (Bio-Rad) per manufacturer's protocol. A HEX reference assay detecting copy  
548 number input of the *CCRL2* gene was used to quantify the chromosome 3 input. The assay  
549 designed to detect insertions at *CCR5* consisted of: F:5'-GGG AGG ATT GGG AAG ACA -3',  
550 R:5'- AGG TGT TCA GGA GAA GGA CA-3', and labeled probe: 5'- FAM/AGC AGG CAT  
551 /ZEN/GCT GGG GAT GCG GTG G/3IABkFQ-3'. The reference assay designed to detect the  
552 *CCRL2* genomic sequence: F:5'-CCT CCT GGC TGA GAA AAA G -3', R:5'- GCT GTA TGA  
553 ATC CAG GTC C -3', and labeled probe: 5'- HEX/TGT TTC CTC /ZEN/CAG GAT AAG GCA  
554 GCT GT/3IABkFQ-3'. The accuracy of this assay was established with genomic DNA from a  
555 mono-allelic colony (50% allele fraction) as template. Final concentration of primer and probes  
556 was 900 nM and 250 nM respectively. 20  $\mu$ L of the PCR reaction was used for droplet generation,  
557 and 40  $\mu$ L of the droplets was used in the following PCR conditions: 95° - 10 min, 45 cycles of  
558 94° - 30 s, 57°C - 30 s, and 72° - 2 min, finalize with 98° - 10 min and 4°C until droplet analysis.

559 Droplets were analyzed on a QX200 Droplet Reader (Bio-Rad) detecting FAM and HEX positive  
560 droplets. Control samples with non-template control, genomic DNA, and mock-treated samples,  
561 and 50% modification control were included. Data was analyzed using QuantaSoft (Bio-Rad).

562

### 563 **HSPC Selection and Culturing**

564 Human CD34+ HSPCs mobilized peripheral blood purchased from AllCells (Alameda, CA, USA)  
565 and thawed per manufacturer's instructions. CD34+ HSPCs were purified from umbilical cord  
566 blood collected donated under informed consent via the Binns Program for Cord Blood Research  
567 at Stanford University and used without freezing. In brief, mononuclear cells were isolated by  
568 density gradient centrifugation using Ficoll Paque Plus. Following two platelet washes, HSPCs  
569 were labeled and positively selected using the CD34+ Microbead Kit Ultrapure (Miltenyi Biotec,  
570 San Diego, CA, USA) per manufacturer's protocol. Enriched cells were stained with APC anti-  
571 human CD34 (Clone 561; Biolegend, San Jose, CA, USA) and sample purity was assessed on an  
572 Accuri C6 flow cytometer (BD Biosciences, San Jose, CA, USA). Cells were cultured at 37°C,  
573 5% CO<sub>2</sub>, and 5% O<sub>2</sub> for 48 hours prior to gene editing. Culture media consisted of StemSpan  
574 SFEM II (Stemcell Technologies, Vancouver, Canada) supplemented with SCF (100 ng/ml), TPO  
575 (100 ng/ml), Flt3-Ligand (100 ng/ml), IL-6 (100 ng/ml), UM171 (35nM), and StemRegenin1 (0.75  
576 mM).

577

### 578 **Colony-forming unit assay and clonal genotyping**

579 Cells were single-cell sorted into 96-well plates (Corning) pre-filled with 100 µl of methylcellulose  
580 (Methocult, StemCell Technologies).

581 Single YFP+, YFP-, and mock-treated cells were sorted into methylcellulose media containing  
582 SCF, IL3, erythropoietin and GM-CSF, conditions that support the growth of blood progenitor  
583 cells: erythroid progenitors (burst forming unit-erythroid or BFU-E, and colony-forming unit-  
584 erythroid or CFU-E), granulocyte-macrophage progenitors (CFU-GM), and multi-potential  
585 granulocyte, erythroid, macrophage, megakaryocyte progenitor cells (CFU-GEMM).

586 After 14 days, colonies were counted and scored as BFU-E, CFU-M, CFU-GM and CFU-GEMM  
587 per the manual for 'Human Colony-forming Unit (CFU) Assays Using MethoCult' from StemCell  
588 Technologies. For DNA extraction from 96-well plates, PBS was added to wells with colonies,  
589 and the contents were mixed and transferred to a U-bottomed 96-well plate. Cells were pelleted by

590 centrifugation at 300xg for 5 min followed by a wash with PBS. Finally, cells were resuspended  
591 in 25 µl QuickExtract DNA Extraction Solution (Epicentre, Madison, WI, USA) and transferred  
592 to PCR plates, which were incubated at 65°C for 10 min followed by 100°C for 2 min. For *CCR5*,  
593 a 3-primer PCR was set up with a forward primer outside the left homology arm (5'-  
594 CACCATGCTTGACCCAGTTT-3'), a forward primer binding the poly-adenylation signal in all  
595 inserts (5'-CGCATTGTCTGAGTAGGTGT-3'), and a reverse primer binding inside the right  
596 homology arm (5'-AGGTGTTTCAGGAGAAGGACA-3'). Accupower premix was used for PCR  
597 reaction and cycled at the parameters: 95° - 5 min, and 35 cycles of 95° - 20 s, 72°C - 60 s. DNA  
598 fragments were detected by agarose gel electrophoresis.

599

### 600 **Macrophage differentiation and flow cytometry**

601 CD34<sup>+</sup> HSPCs were seeded at a density of 2x10<sup>5</sup> cells/mL in untreated 6-well polystyrene plates  
602 in differentiation medium (SFEM II supplemented with SCF (200 ng/ml), Il-3 (10 ng/mL), IL-6  
603 (10 ng/mL), FLT3-L (50 ng/mL), M-CSF (10 ng/ml), penicillin/streptomycin (10 U/mL), and  
604 cultured at 37 °C 5% CO<sub>2</sub>, and 5% O<sub>2</sub>. After 48 hours, non-adherent cells were removed from  
605 plates and reseeded in new non-treated 6-well polystyrene plates at 2x10<sup>5</sup> cells/mL in  
606 differentiation medium. Adherent cells were maintained in the same plates in maintenance medium  
607 (RPMI supplemented with FBS (10% v/v), M-CSF (10 ng/ml) and penicillin/streptomycin (10  
608 U/mL). After two weeks, adherent cells, comprising terminally differentiated macrophages, were  
609 harvested by incubation with 10 mM EDTA and gentle scraping. For phenotypic analysis we  
610 harvested 1x10<sup>5</sup> cells per condition resuspended in 100 µl staining buffer (PBS containing 2%  
611 FBS and 0.4% EDTA). Non-specific antibody binding was blocked (5% v/v TruStain FcX,  
612 BioLegend, #422302) and cells were stained with 2 µl of each fluorophore-conjugated monoclonal  
613 antibody (30 minutes, 4°C, dark). Antibodies used were hCD34-APC (BioLegend #343510),  
614 hCD14-BV510 (BioLegend #301842) and hCD11b-PE (BioLegend #101208). Propidium Iodide  
615 (1 µg/mL) was used to detect dead cells and cells were analyzed on a BD FACSAria flow  
616 cytometer.

617

### 618 **Transplantation of CD34<sup>+</sup> HSPCs into NSG mice**

619 Targeted cells (sorted or bulk) were transplanted four to five days after  
620 electroporation/transduction. YFP-negative (YFP<sup>-</sup>), and YFP-positive (YFP<sup>+</sup>) cells were isolated

621 using FACS and ~400,000 cells were transplanted intra-femorally into sub-lethally irradiated (2.1  
622 Gy) 6 to 8-week-old mice. Approximately  $1 \times 10^6$  cells HPSCs modified with cassettes without  
623 YFP and were transplanted in bulk. Mice were randomly assigned to each experimental group and  
624 analyzed in a blinded fashion.

625

### 626 **Assessment of human engraftment**

627 16-18 weeks after transplantation, samples of peripheral blood, bone marrow, and spleen were  
628 harvested from recipient mice. Samples were treated with ammonium chloride to eliminate mature  
629 erythrocytes. Non-specific antibody binding was blocked (10% vol/vol, TruStain FcX,  
630 BioLegend), cells were stained (30 min, 4°C, dark), and analyzed by setting nucleated cell scatter  
631 gates using a BD FACSAria II flow cytometer or BD FACSCanto II analyzer (BD Biosciences).  
632 Cells were analyzed based on monoclonal anti-human HLA-ABC APC-Cy7 (W6/32, BioLegend),  
633 anti-mouse CD45.1 PE-Cy7 (A20, eBioScience, San Diego, CA, USA), CD19 APC (HIB19,  
634 BD511 Biosciences), CD33 PE (WM53, BD Biosciences), anti-mouse mTer119 PE-Cy5 (TER-  
635 119, BD Biosciences), and CD3 PerCP/Cy5.5 (HiT3A, BioLegend) antibodies, and Propidium  
636 Iodide to detect dead cells. Human engraftment was defined as HLA-ABC<sup>+</sup>/HCD45<sup>+</sup> cells.

637

### 638 **IDUA activity assay**

639 IDUA enzyme activity was measured fluoremetrically using 4-methylumbelliferyl  $\alpha$ -L-iduronide  
640 (4MU-iduronide) (LC Scientific Inc., Canada) per established assay conditions<sup>4</sup>. Briefly, for  
641 IDUA the 4-methylumbelliferyl-iduronide substrate is diluted with sodium formate buffer, 0.4 M,  
642 pH 3.5, to 6.6 mM concentration. 25  $\mu$ L aliquots of substrate are mixed with 25  $\mu$ L of cell or tissue  
643 homogenates and adjusted to a final substrate concentration of 2.5 mM. The mixture is incubated  
644 at 37 °C for 60 min, and 200  $\mu$ L glycine carbonate buffer (pH 10.4) is added to quench the reaction.  
645 4-MU (Sigma) is used to make the standard curve. The resulting fluorescence is measured using a  
646 SpectraMax M3 plate reader with excitation at 355 nm and emission at 460 nm (Molecular  
647 devices).

648

### 649 **Analysis of glycosaminoglycans**

650 Urine and tissue GAGs were measured with the modified dimethylmethylene blue assay  
651 (DMB)<sup>5</sup>. Tissue samples (10 - 30 mg) were incubated for 3 hours at 65 °C in papain digest solution



652 (calcium- and magnesium-free PBS containing 1% papain suspension (Sigma), 5 mM cysteine,  
653 and 10 mM EDTA, pH 7.4) to a final concentration of 0.05 mg tissue/mL buffer. 50  $\mu$ L of extract  
654 was incubated with 200  $\mu$ L DBM reagent (9:1 31  $\mu$ M DMB stock (in formiate buffer 55 nM): 2  
655 M Tris base). The samples were read on a microplate reader at 520 nm.

656

### 657 **Histology**

658 Histology was performed by HistoWiz Inc. (histowiz.com) using standard operating procedures  
659 and fully automated workflow. Samples were processed, embedded in paraffin, and sectioned at  
660 4 $\mu$ m. Sections were then counterstained with toluidine blue or Alcian blue, dehydrated and film  
661 coverslipped using a TissueTek-Prisma and Coverslipper (Sakura). Whole slide scanning (40x)  
662 was performed on an Aperio AT2 (Leica Biosystems).

663

### 664 **Immunocytochemistry**

665 MPSI fibroblasts cultures cells were fixed in 4% paraformaldehyde in phosphate-buffered saline  
666 (PBS), blocked with 3% bovine serum albumin (BSA) in PBS, and stained with rabbit anti-LAMP1  
667 (Abcam) followed by 1:500 dilutions of Alexa 488-conjugated anti-rabbit antibody (Molecular  
668 Probes). Mounting and staining of nuclei was done Vectashield with DAPI (Vector labs). Slides  
669 were visualized by conventional epifluorescence microcopy using a cooled CCD camera  
670 (Hamamatsu) coupled to an inverted Nikon Eclipse Ti microscope. Images were acquired using  
671 NIS elements software and analyzed with ImageJ.

672

### 673 **Computerized Tomography**

674 High-resolution Micro-CT scans were acquired at Stanford Center for Innovation in In-Vivo  
675 Imaging (SCI<sup>3</sup>) using an eXplore CT 120 scanner (TriFoil imaging). Mice were anesthetized with  
676 isoflurane (Baxter Corporation, Mississauga, ON, Canada). The scans were obtained with voxel  
677 resolution of 100  $\mu$ m, an energy level of 80 keV, and 360 degrees of whole mice. Microview  
678 software (Parallax innovations) was used for isosurface rendering and measurements. Skull  
679 thickness was quantified on Midsagittal images. Femur length was determined by measuring the  
680 long axis between the two epiphysis. Zygomatic bone thickness was measures on coronal sections,  
681 perpendicular to the axis of the zygoma. Bone lengths were determined using the line measurement

682 tool in MicroView. Femurs were measured from the base of the lateral femoral condyle to the tip  
683 of the greater trochanter.

684

### 685 **Spontaneous locomotor activity**

686 All behavioral experimenters were blind to the genotype of the mice throughout testing. All tests  
687 were conducted in the light cycle. In all experiments, animals were habituated to the testing room  
688 2 h before the tests and were handled by the experimenter for three days before all the behavioral  
689 tests. For spontaneous locomotor activity, assessment took place using the open field test in a  
690 square arena ( $76 \times 76 \text{ cm}^2$ ) with opaque white walls, surrounded with privacy blinds to eliminate  
691 external room cues. Mice were placed in the center of the open-field arena and allowed to freely  
692 move for 10 min while being tracked by Ethovision (Noldus Information Technology,  
693 Wageningen, the Netherlands) automated tracking system. Before each trial, the surface of the  
694 arena was cleaned with Virkon disinfectant. For analysis, the arena was divided into a central ( $53.5$   
695  $\times 53.5 \text{ cm}^2$ ) and a peripheral zone (11.25-cm wide).

696

### 697 **Passive Inhibitory Avoidance**

698 The passive inhibitory avoidance test was used to assess fear-based learning and memory. We used  
699 a dual-compartment system (GEMINI system, San Diego Instruments), where lighted and dark  
700 compartments, equipped with grid floor that can deliver electrical shocks, are separated by an  
701 automated gate. On day one, each mouse was habituated to the apparatus by placing it into the  
702 lighted compartment. After 30 s, the gate opened allowing access to the dark compartment. When  
703 the mice entered the dark compartment, the gate closed and the time to cross after the gate opened  
704 is recorded (latency time). On day 2 or training day, the mice receive a 0.5 mA shock for 2 s after  
705 a 3 s delay after crossing from the lighted to the dark compartment. On day 3, or testing day, after  
706 being placed in the lighted compartment for 5 s, the gate opened allowing access to the dark  
707 compartment. The latency to enter the dark compartment was recorded. Maximum time to cross  
708 was 10 minutes.

709

### 710 **Marble Burying**

711 Repetitive behavior was tested in the marble bury test. Individual mice were introduced into cages  
712 containing 20 black glass marbles (1.5 cm diameter, four equidistant rows of five marbles each)

713 on top of bedding 5 cm deep. After 30 min under low-light conditions, mice were removed and  
714 the number of marbles that were at least half-covered was determined.

715

#### 716 **Mice**

717 NOD.Cg-Prkdc<sup>scid</sup>IL2rg<sup>tmlWjl</sup>/Sz (NSG) mice were developed at The Jackson Laboratory<sup>6</sup>.

718 Mice were housed in a 12-h dark/light cycle, temperature- and humidity-controlled environment  
719 with pressurized individually ventilated caging, sterile bedding, and unlimited access to sterile  
720 food and water in the animal barrier facility at Stanford University. All experiments were  
721 performed in accordance with National Institutes of Health institutional guidelines and were  
722 approved by the University Administrative Panel on Laboratory Animal Care (IACUC 25065).

723

#### 724 **NSG-IDUA<sup>X/X</sup> mice**

725 We used CRISPR/Cas9 to knock-in the W401X mutation (UniProtKB - Q8BMG0), analogous to  
726 the W402X mutation commonly found in patients with severe MPSI, into NSG mouse embryos<sup>7</sup>.

727 The guide RNA target sequence was searched using [crispr.mit.edu](http://crispr.mit.edu) and six shortlisted guides  
728 close to the target site were first screened by using an *in vivo* assay in NIH 3T3 cells. Two  
729 guides, one each on both sides of the target site, were selected: Guide1 (5'-

730 TTATAGATGGAGAACAACCTC-3') cleaves 4 bases upstream and Guide3 (5'-

731 GTTGGACAGCAATCATAACAG-3') cleaves 44 bases downstream of the target site. The guides  
732 were prepared by *in vitro* transcription (HiScribe™ T7 High Yield RNA Synthesis Kit, E2040S,  
733 New England Biolabs) of a dsDNA template generated by annealing two oligos (with a T7  
734 promoter in the sense oligo) followed by a standard PCR reaction. The ssODN donor DNA  
735 contained an intended point mutation leading to a STOP codon (TGG to TAG): 5'-

736 ggtgggagctagatattagggttaggaagccagatgctaggtatgagagagccaacagcctcagccctctgcttgcttatagATGGA

737 GAACAA/CTCTAGGCAGAGGTCTCAAAGGCTGGGGCTGTGTTGGACAGCAATCATA/

738 CAGTGGGTGTCCTGGCCAGCACCCATCACCTGAAGGCTCCGCAGCGGCCTGGAGT

739 AC-3' (lower case is intron, upper case is exon, guide cut sites marked by "/" and the mutation in  
740 bold).

741 Mouse Zygotes were obtained by mating NSG stud males with super-ovulated NSG females.

742 Female NSG mice 3–4 weeks of age (JAX Laboratories, stock number 005557) were super-

743 ovulated by intraperitoneal injection with 2.5IU pregnant mare serum gonadotropin (National  
744 Hormone & Peptide Program, NIDDK), followed 48 hours later by injection of 2.5 IU human  
745 chorionic gonadotropin (hCG, National Hormone & Peptide Program, NIDDK). The animals were  
746 sacrificed 14 hours following hCG administration and fertilized eggs were collected. CRISPR  
747 Injection mixture was prepared by dilution of the components into injection buffer (5 mM Tris,  
748 0.1 mM EDTA, pH 7.5) to obtain the following concentrations: 10 ng/ $\mu$ l Cas9 mRNA (Thermo  
749 Fisher Scientific, Carlsbad, CA), 10 ng/ $\mu$ l IDUA1F and IDUA3F guide RNA and 10 ng/ $\mu$ l ssODN  
750 Donor (Integrated DNA Technologies, Coraville, IA). Zygote injections and embryo transfers  
751 were performed using standard protocols described previously<sup>8</sup>. A total of 38 zygotes were  
752 injected, the surviving 27 zygotes were transferred, which yielded 7 live offspring. Among these  
753 a male homozygous for the mutation was used to establish the NSG-IDUA<sup>X/X</sup> colony. Mice were  
754 genotyped by-PCR based amplification followed by Sanger sequencing using the following  
755 primers: GENO F: 5'-CATGGCCCTGTTGGGTGAGTAATGA-3', and GENO R: 5'-  
756 TGTGGTACTCCAGGCCGCTG-3'.

757

### 758 **Statistical analysis**

759 All statistical test including paired and unpaired t-tests, and one-way analysis of variance  
760 (ANOVA) followed by Tukey's multiple comparisons test was performed using GraphPad Prism  
761 version 7 for Mac OS X, GraphPad Software, La Jolla California USA. Data was reported as means  
762 when all conditions passed three normality tests (D'Agostino & Pearson, Shapiro-Wilk, and KS  
763 normality test).

764

### 765 **Acknowledgements**

766 We thank Stanford's behavioral and functional neurosciences laboratory for advice with  
767 neurobehavioral studies. We also thank Stanford's Binns Program for Cord Blood Research for  
768 providing cells. We also would like to give thanks to the members of the Porteus laboratory for  
769 input, comments, and discussion. This work was supported by the Stanford's Child Health  
770 Research Institute (CHRI), the National Organization of Rare Disorders (NORD), the Thrasher

771 Research Fund, and National Institute of Neurological Disorders and Stroke (NINDS,  
772 1K08NS102398-01).

773

#### 774 **Author contributions**

775 N.G.-O. conceived the project, collected data, performed experiments, carried out the analyses,  
776 and wrote the manuscript; S.G. B. performed macrophage experiments, assisted with mouse  
777 studies and figure preparation; N.M. assisted with mouse colony management, transplantation and  
778 flow cytometry; R.O.B performed CCR5 guide design and validation; S.M. obtained and purified  
779 CD34+-HSPCs from donated cord-blood and assisted with secondary transplants; R.M.Q and  
780 C.B.G. designed and generated the NSG-IDUA<sup>X/X</sup> mice; C.L. and G.B. performed and analyzed  
781 off-target studies; L.A. assisted with manuscript preparation and figure design; M.P.H. directed  
782 the project, assisted with experimental design, and manuscript preparation.

783

#### 784 **Competing interests**

785 M.H.P. is a consultant and has equity interest in CRISPR Tx, but CRISPR Tx had no input or  
786 opinions on the subject matter described in this manuscript.

787

#### 788 **Materials and correspondence**

789 Materials and correspondence to be addressed to Natalia Gomez-Ospina and Matthew H. Porteus.

790

791

## References

- 1 Wraith, J. E. & Jones, S. Mucopolysaccharidosis type I. *Pediatr Endocrinol Rev* **12 Suppl 1**, 102-106 (2014).
- 2 Wraith, J. E. *et al.* Enzyme replacement therapy for mucopolysaccharidosis I: a randomized, double-blinded, placebo-controlled, multinational study of recombinant human alpha-L-iduronidase (laronidase). *J Pediatr* **144**, 581-588, doi:10.1016/j.jpeds.2004.01.046 (2004).
- 3 Mitchell, R. *et al.* Outcomes of haematopoietic stem cell transplantation for inherited metabolic disorders: a report from the Australian and New Zealand Children's Haematology Oncology Group and the Australasian Bone Marrow Transplant Recipient Registry. *Pediatr Transplant* **17**, 582-588, doi:10.1111/ptr.12109 (2013).
- 4 Tanaka, A. *et al.* Long-term efficacy of hematopoietic stem cell transplantation on brain involvement in patients with mucopolysaccharidosis type II: a nationwide survey in Japan. *Mol Genet Metab* **107**, 513-520, doi:10.1016/j.ymgme.2012.09.004 (2012).
- 5 Wynn, R. F. *et al.* Improved metabolic correction in patients with lysosomal storage disease treated with hematopoietic stem cell transplant compared with enzyme replacement therapy. *J Pediatr* **154**, 609-611, doi:10.1016/j.jpeds.2008.11.005 (2009).
- 6 Aldenhoven, M. *et al.* Long-term outcome of Hurler syndrome patients after hematopoietic cell transplantation: an international multicenter study. *Blood* **125**, 2164-2172, doi:10.1182/blood-2014-11-608075 (2015).
- 7 Visigalli, I. *et al.* Gene therapy augments the efficacy of hematopoietic cell transplantation and fully corrects mucopolysaccharidosis type I phenotype in the mouse model. *Blood* **116**, 5130-5139, doi:10.1182/blood-2010-04-278234 (2010).
- 8 Wang, D. *et al.* Reprogramming erythroid cells for lysosomal enzyme production leads to visceral and CNS cross-correction in mice with Hurler syndrome. *Proc Natl Acad Sci U S A* **106**, 19958-19963, doi:10.1073/pnas.0908528106 (2009).
- 9 Biffi, A. *et al.* Lentiviral hematopoietic stem cell gene therapy benefits metachromatic leukodystrophy. *Science* **341**, 1233158, doi:10.1126/science.1233158 (2013).
- 10 McCormack, M. P. & Rabbitts, T. H. Activation of the T-cell oncogene LMO2 after gene therapy for X-linked severe combined immunodeficiency. *N Engl J Med* **350**, 913-922, doi:10.1056/NEJMra032207 (2004).
- 11 Ranzani, M. *et al.* Lentiviral vector-based insertional mutagenesis identifies genes associated with liver cancer. *Nat Methods* **10**, 155-161, doi:10.1038/nmeth.2331 (2013).
- 12 Pan, Y. W., Scarlett, J. M., Luoh, T. T. & Kurre, P. Prolonged adherence of human immunodeficiency virus-derived vector particles to hematopoietic target cells leads to secondary transduction in vitro and in vivo. *J Virol* **81**, 639-649, doi:10.1128/JVI.01089-06 (2007).
- 13 Persons, D. A., Hargrove, P. W., Allay, E. R., Hanawa, H. & Nienhuis, A. W. The degree of phenotypic correction of murine beta -thalassemia intermedia following lentiviral-mediated transfer of a human gamma-globin gene is influenced by chromosomal position effects and vector copy number. *Blood* **101**, 2175-2183, doi:10.1182/blood-2002-07-2211 (2003).
- 14 Bak, R. O., Gomez-Ospina, N. & Porteus, M. H. Gene Editing on Center Stage. *Trends in Genetics* **34**, 11, doi:10.1016/j.tig.2018.05.004 (2018).
- 15 Dever, D. P. *et al.* CRISPR/Cas9 beta-globin gene targeting in human haematopoietic stem cells. *Nature* **539**, 384-389, doi:10.1038/nature20134 (2016).

- 16 Liu, R. *et al.* Homozygous defect in HIV-1 coreceptor accounts for resistance of some multiply-exposed individuals to HIV-1 infection. *Cell* **86**, 367-377 (1996).
- 17 Bak, R. O., Dever, D. P. & Porteus, M. H. CRISPR/Cas9 genome editing in human hematopoietic stem cells. *Nat Protoc* **13**, 358-376, doi:10.1038/nprot.2017.143 (2018).
- 18 Hendel, A. *et al.* Chemically modified guide RNAs enhance CRISPR-Cas genome editing in human primary cells. *Nat Biotechnol* **33**, 985-989, doi:10.1038/nbt.3290 (2015).
- 19 Clarke, L. A. *et al.* Murine mucopolysaccharidosis type I: targeted disruption of the murine alpha-L-iduronidase gene. *Hum Mol Genet* **6**, 503-511 (1997).
- 20 Wang, D. *et al.* Characterization of an MPS I-H knock-in mouse that carries a nonsense mutation analogous to the human IDUA-W402X mutation. *Mol Genet Metab* **99**, 62-71, doi:10.1016/j.ymgme.2009.08.002 (2010).
- 21 Mendez, D. C. *et al.* A novel, long-lived, and highly engraftable immunodeficient mouse model of mucopolysaccharidosis type I. *Mol Ther Methods Clin Dev* **2**, 14068, doi:10.1038/mtm.2014.68 (2015).
- 22 Lombardo, A. *et al.* Site-specific integration and tailoring of cassette design for sustainable gene transfer. *Nat Methods* **8**, 861-869, doi:10.1038/nmeth.1674 (2011).
- 23 Hu, Z., Van Rooijen, N. & Yang, Y. G. Macrophages prevent human red blood cell reconstitution in immunodeficient mice. *Blood* **118**, 5938-5946, doi:10.1182/blood-2010-11-321414 (2011).
- 24 Cradick, T. J., Qiu, P., Lee, C. M., Fine, E. J. & Bao, G. COSMID: A Web-based Tool for Identifying and Validating CRISPR/Cas Off-target Sites. *Mol Ther Nucleic Acids* **3**, e214, doi:10.1038/mtna.2014.64 (2014).
- 25 Vakulskas, C. A. *et al.* A high-fidelity Cas9 mutant delivered as a ribonucleoprotein complex enables efficient gene editing in human hematopoietic stem and progenitor cells. *Nat Med* **24**, 1216-1224, doi:10.1038/s41591-018-0137-0 (2018).
- 26 Aldenhoven, M. *et al.* Hematopoietic cell transplantation for mucopolysaccharidosis patients is safe and effective: results after implementation of international guidelines. *Biol Blood Marrow Transplant* **21**, 1106-1109, doi:10.1016/j.bbmt.2015.02.011 (2015).
- 27 Sadelain, M., Papapetrou, E. P. & Bushman, F. D. Safe harbours for the integration of new DNA in the human genome. *Nat Rev Cancer* **12**, 51-58, doi:10.1038/nrc3179 (2012).
- 28 Wang, D. *et al.* Engineering a lysosomal enzyme with a derivative of receptor-binding domain of apoE enables delivery across the blood-brain barrier. *Proc Natl Acad Sci U S A* **110**, 2999-3004, doi:10.1073/pnas.1222742110 (2013).
- 29 Sharma, R. *et al.* In vivo genome editing of the albumin locus as a platform for protein replacement therapy. *Blood* **126**, 1777-1784, doi:10.1182/blood-2014-12-615492 (2015).
- 30 Heyer, W. D., Ehmsen, K. T. & Liu, J. Regulation of homologous recombination in eukaryotes. *Annu Rev Genet* **44**, 113-139, doi:10.1146/annurev-genet-051710-150955 (2010).
- 31 Yang, D. *et al.* Enrichment of G2/M cell cycle phase in human pluripotent stem cells enhances HDR-mediated gene repair with customizable endonucleases. *Sci Rep* **6**, 21264, doi:10.1038/srep21264 (2016).
- 32 van Galen, P. *et al.* The unfolded protein response governs integrity of the haematopoietic stem-cell pool during stress. *Nature* **510**, 268-272, doi:10.1038/nature13228 (2014).
- 33 Fares, I. *et al.* Cord blood expansion. Pyrimidoindole derivatives are agonists of human hematopoietic stem cell self-renewal. *Science* **345**, 1509-1512, doi:10.1126/science.1256337 (2014).

- 34 Boitano, A. E. *et al.* Aryl hydrocarbon receptor antagonists promote the expansion of human hematopoietic stem cells. *Science* **329**, 1345-1348, doi:10.1126/science.1191536 (2010).
- 35 Oussoren, E. *et al.* Residual alpha-L-iduronidase activity in fibroblasts of mild to severe Mucopolysaccharidosis type I patients. *Mol Genet Metab* **109**, 377-381, doi:10.1016/j.ymgme.2013.05.016 (2013).
- 36 Elliott, S. *et al.* Pilot study of newborn screening for six lysosomal storage diseases using Tandem Mass Spectrometry. *Mol Genet Metab* **118**, 304-309, doi:10.1016/j.ymgme.2016.05.015 (2016).



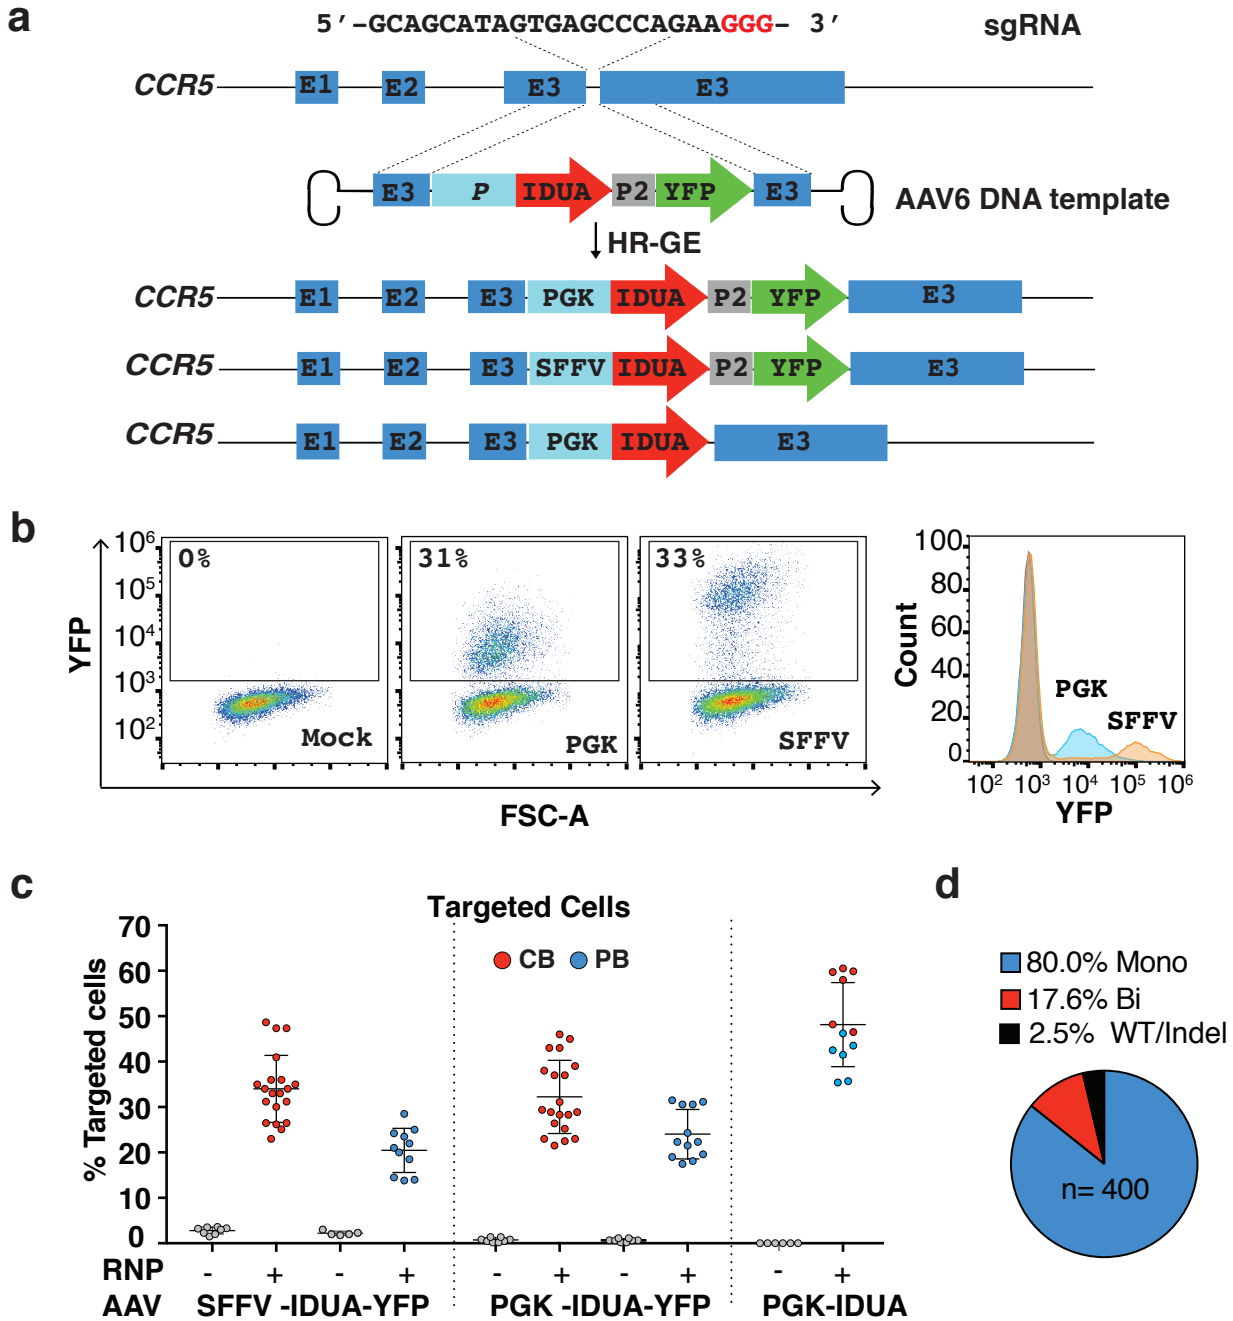

**Fig. 1 | Efficient CRIPR/Cas9-mediated integration of IDUA overexpression cassettes into the *CCR5* locus in human CD34<sup>+</sup> HSPCs. a**, Schematic of targeted integration of IDUA and expression cassettes. The AAV6 genome was constructed to have 500bp arms of homology centered on the cut site, and the IDUA sequence placed under the control of the SFFV or the PGK promoter. In two DNA templates, YFP was expressed downstream of IDUA using the self-cleaving P2A peptide. Analysis was performed 3-days post-modification. **b**, FACS and histogram plots of mock and human HSPCs that underwent RNP and AAV6 exposure with YFP-containing expression cassettes. **c**, Targeting frequencies in CB (red) and PB (blue)-derived HSPCs read by percent fluorescent cells in YFP expressing cassettes and percent colonies with targeted *CCR5* alleles by single cell-derived colony genotyping in cassettes without the reporter. Each dot represents the average of duplicates for a single human cell donor. For RNP+AAV6 conditions with YFP templates, CB=20, PB=11. For the template without selection CB=6, PB=6. Lines indicate mean and SD. **d**, Distribution of wildtype (WT), mono and bi-allelically modified cells (n=400) in YFP-positive HSPCs.

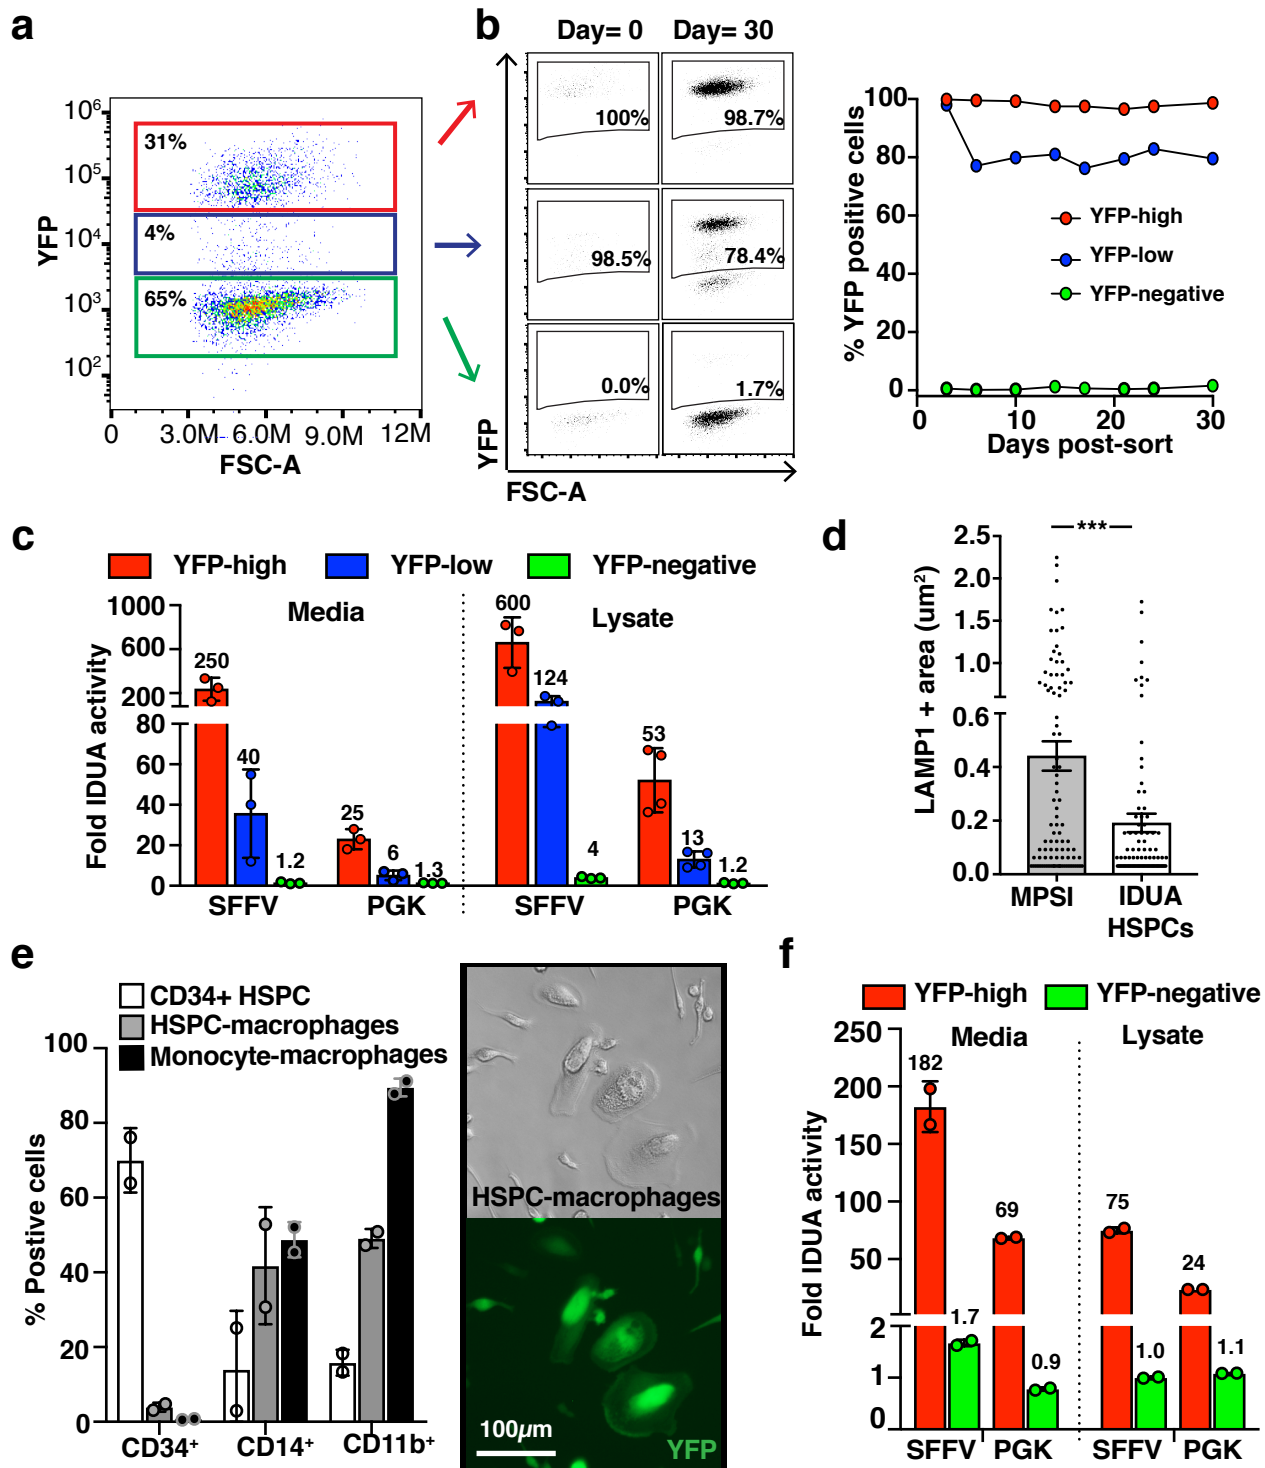

**Fig. 2 | Enhanced IDUA expression by IDUA-HSPCs and derived macrophages.** **a**, FACS plot shows distinct populations based on YFP expression 3 days post-modification. **b**, Persistent YFP expression up to 30 days cultures. **c**, Fold increase in IDUA secretion and intracellular expression by YFP-high, YFP-low, and YFP-negative populations compared to mock cells. **d**, Average LAMP-1+ area in MPSI fibroblasts co-cultured with IDUA-HSPCs. Each dot represents a cell. **e**, Human CD34, CD14, and CD11b marker expression in HSPC-derived macrophages and human monocyte-derived macrophages after *in vitro* differentiation compared to undifferentiated cells (CD34+ HSPCs). Macrophage morphology and YFP expression after differentiation. **f**, Fold increase in IDUA secretion and intracellular expression in HSPC-macrophages modified with SFFV and PGK expression cassettes. **c**, **e**, and **f**, Each dot represents average of triplicates in a human cell donor. All data expressed as mean  $\pm$  SD, \*\*\*  $p < .001$  in two-sided unpaired t-test.

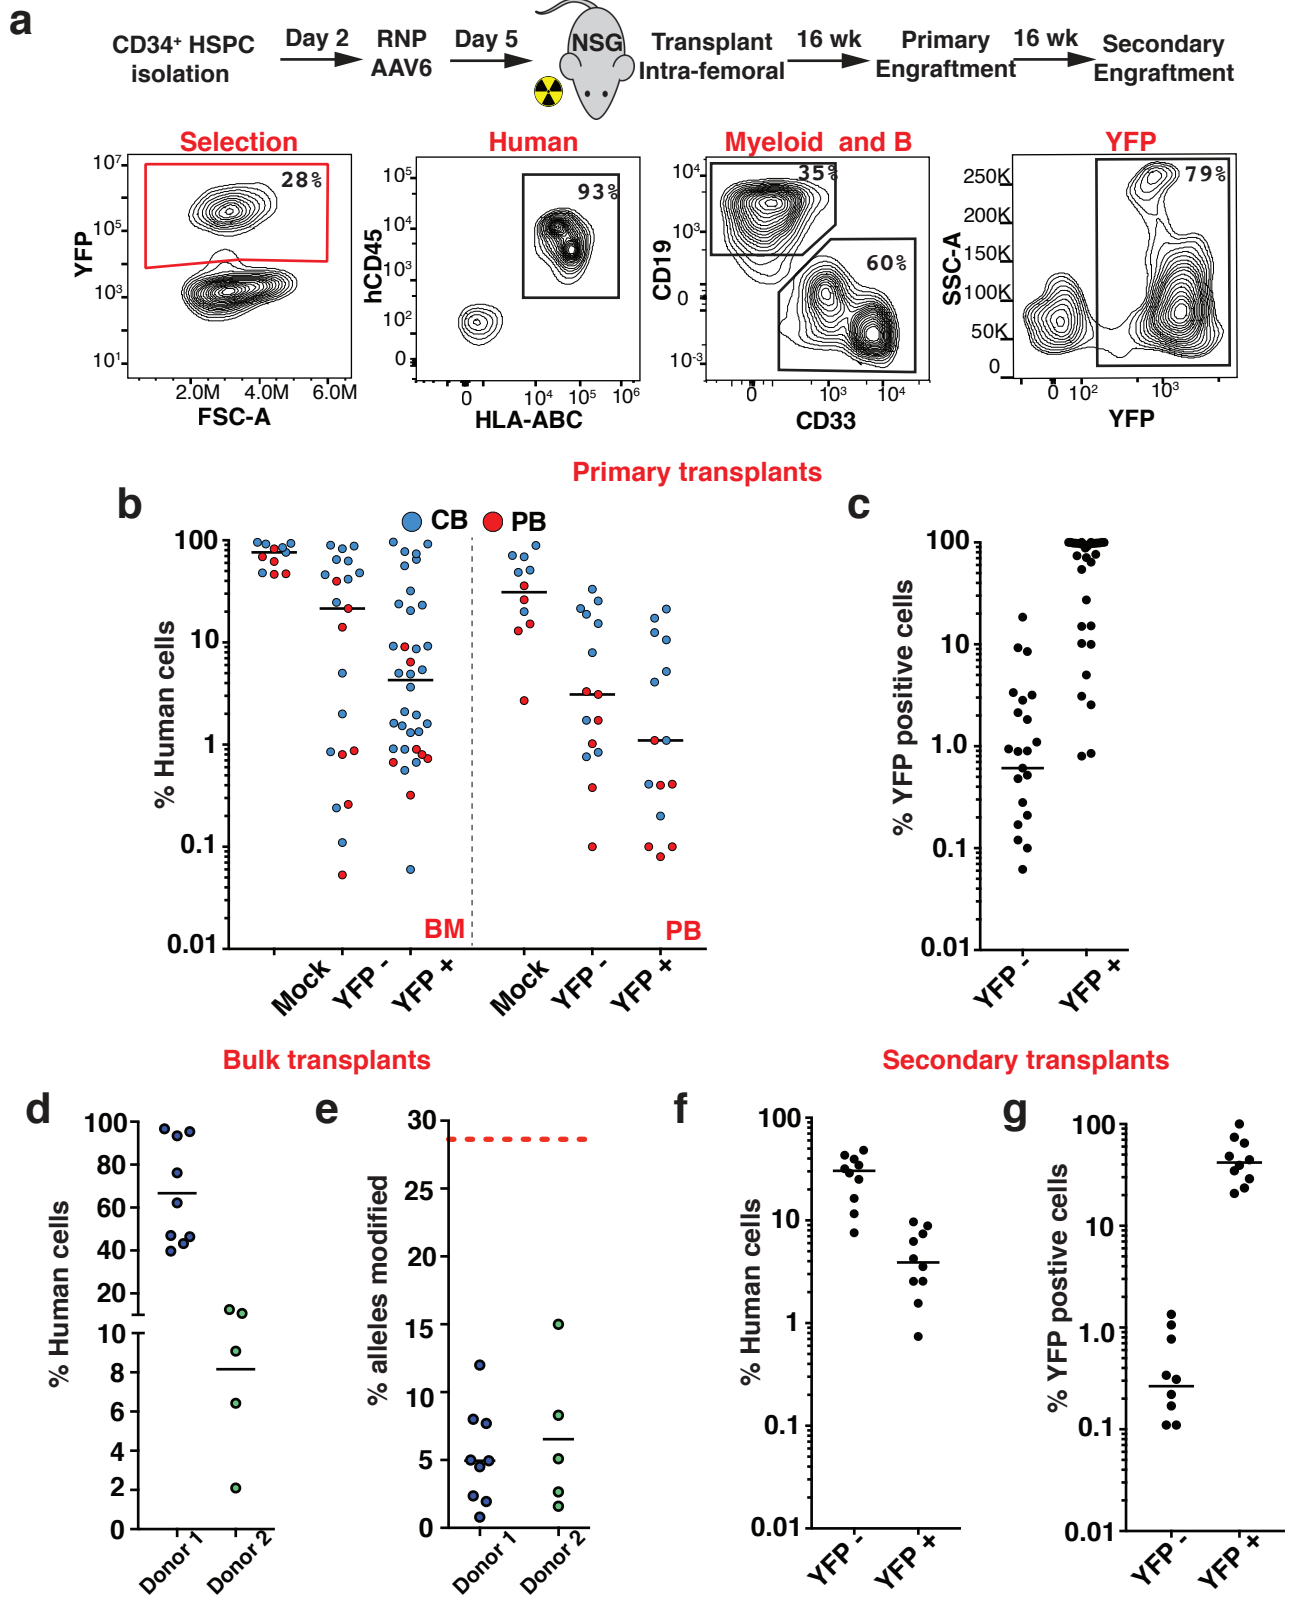

**Fig. 3 | IDUA-HSPCs maintain long-term repopulation capacity.** **a**, Schematic and representative FACS plots showing phenotyping by flow of human, myeloid, B-cell, and targeted cells after engraftment. **b**, Percent human cell chimerism in bone marrow (BM) and peripheral blood (PM) in mice 16-weeks post-transplant with CB (blue) and PB (red)-derived HSPCs targeted with PGK cassettes; mock (n=11), YFP- (n=21), and YFP+ (n=36). Each point represents a mouse. **c**, Percent human YFP+ cells in BM of mice in BM 16-weeks post-transplant. **d**, Percent human cell chimerism in BM in mice transplanted with bulk cells without selection from two different human cell donors. **e**, Percent modified alleles in engrafted cells by ddPCR. 28% was the starting allele modification frequency. **f**, Percent human cell chimerism in BM of mice in secondary transplants 32 weeks after genome editing; YFP- (n=10), and YFP+ (n=10). **g**, Percent human, YFP+ cells in BM of mice in secondary transplants.

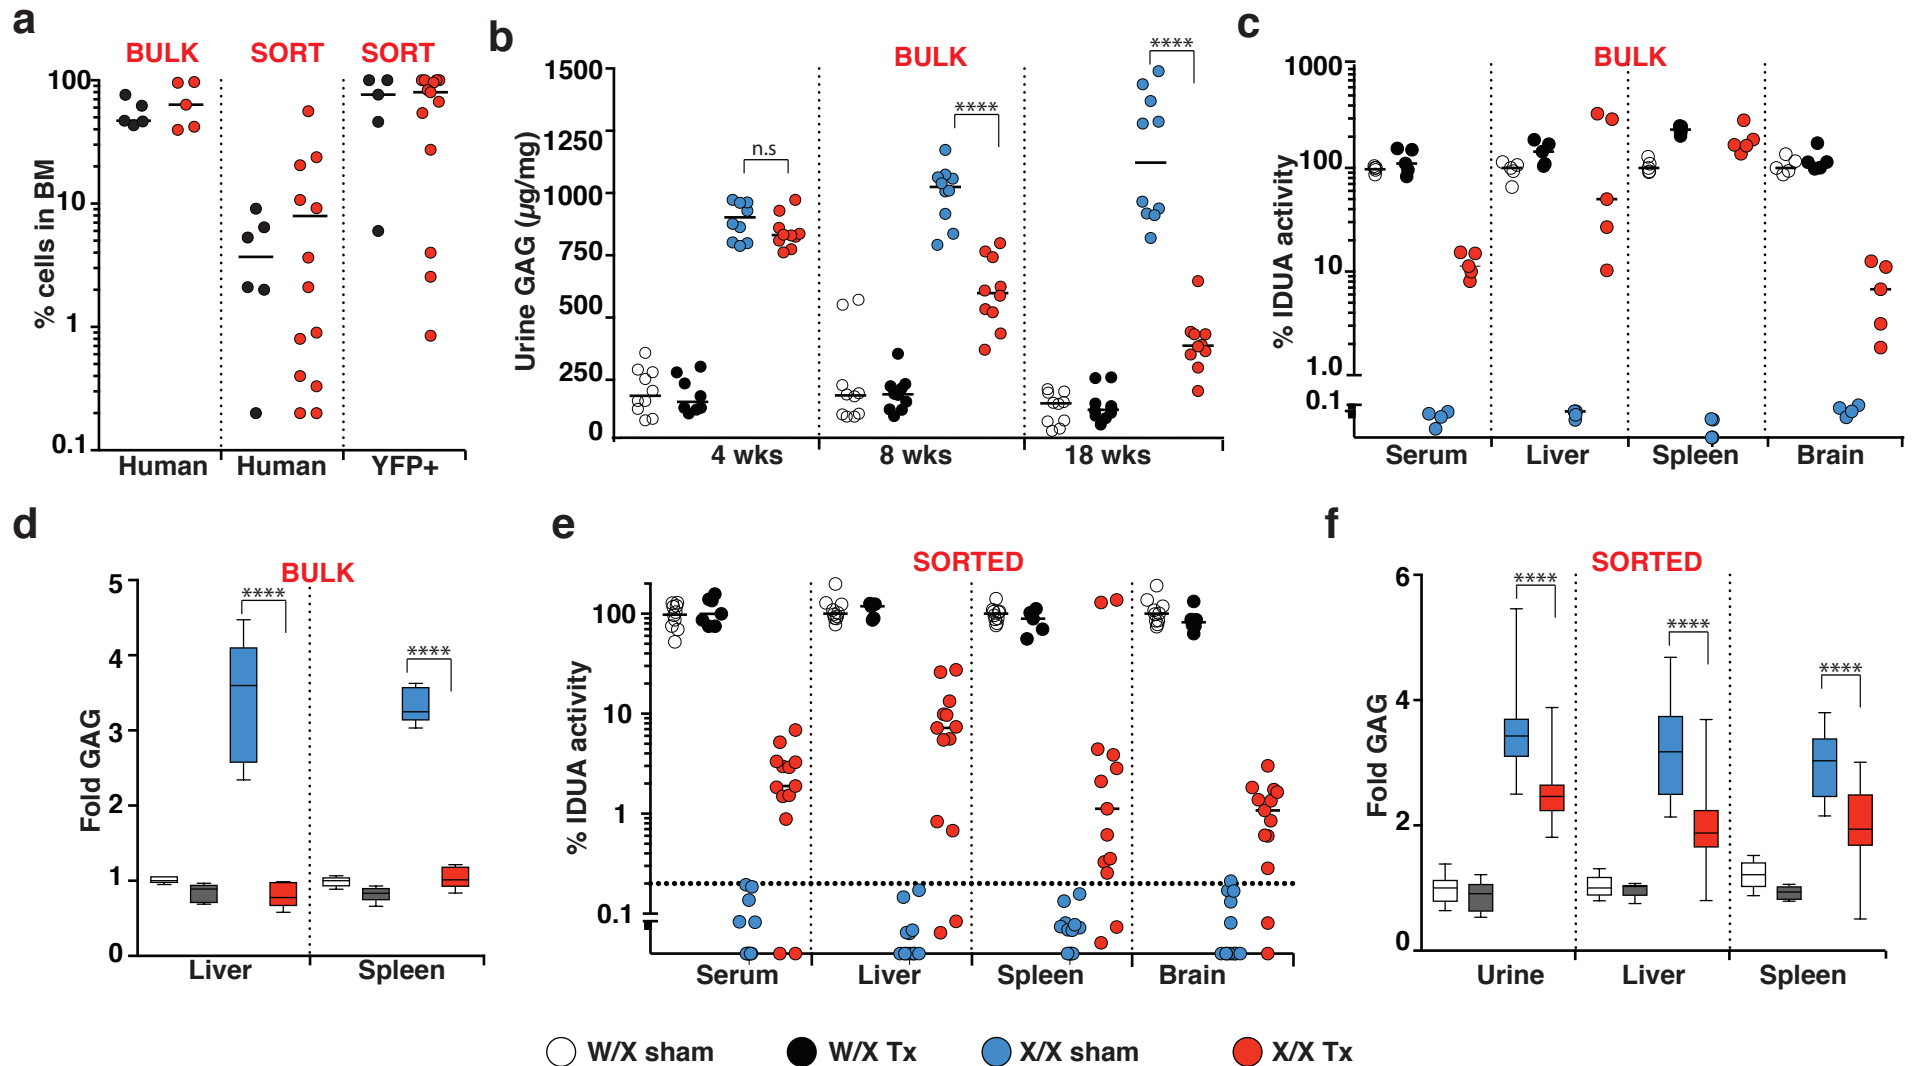

**Fig. 4 | Biochemical correction in NSG-IDUA/X mice by human IDUA-HSPCs. IDUA activity and GAG accumulation in heterozygous sham-treated (W/X sham- clear), heterozygous transplanted (W/X Tx- black), homozygous sham-treated (X/X sham- blue), and homozygous transplanted (X/X Tx- red) mice. a, Percent human and YFP+ cells in BM in experiments using bulk and sorted cells. b, Urinary GAGs at 4,8, and 18 weeks in experiments using bulk cells (n=5 mice per cohort, two measurements per mouse). c, Serum and tissue IDUA activity in experiments using bulk cells (n=5 per cohort). d, Fold GAG storage in liver and spleen (normalized by W/X sham, n=5 per cohort). e, Serum and tissue IDUA activity in experiments using sorted cells (n=5 for W/X Tx and sham mice, and n=13 for X/X Tx and sham mice). f, Fold GAG urinary excretion and tissue storage in experiments using sorted cells (normalized by W/X sham). Median values in all scatter plots. d and f show box plots with whiskers at the 5-95th percentiles. \*\*\*\*:  $p < .0001$  in one-way ANOVA test. Post hoc comparisons were made with the Tukey's multiple comparisons test.**

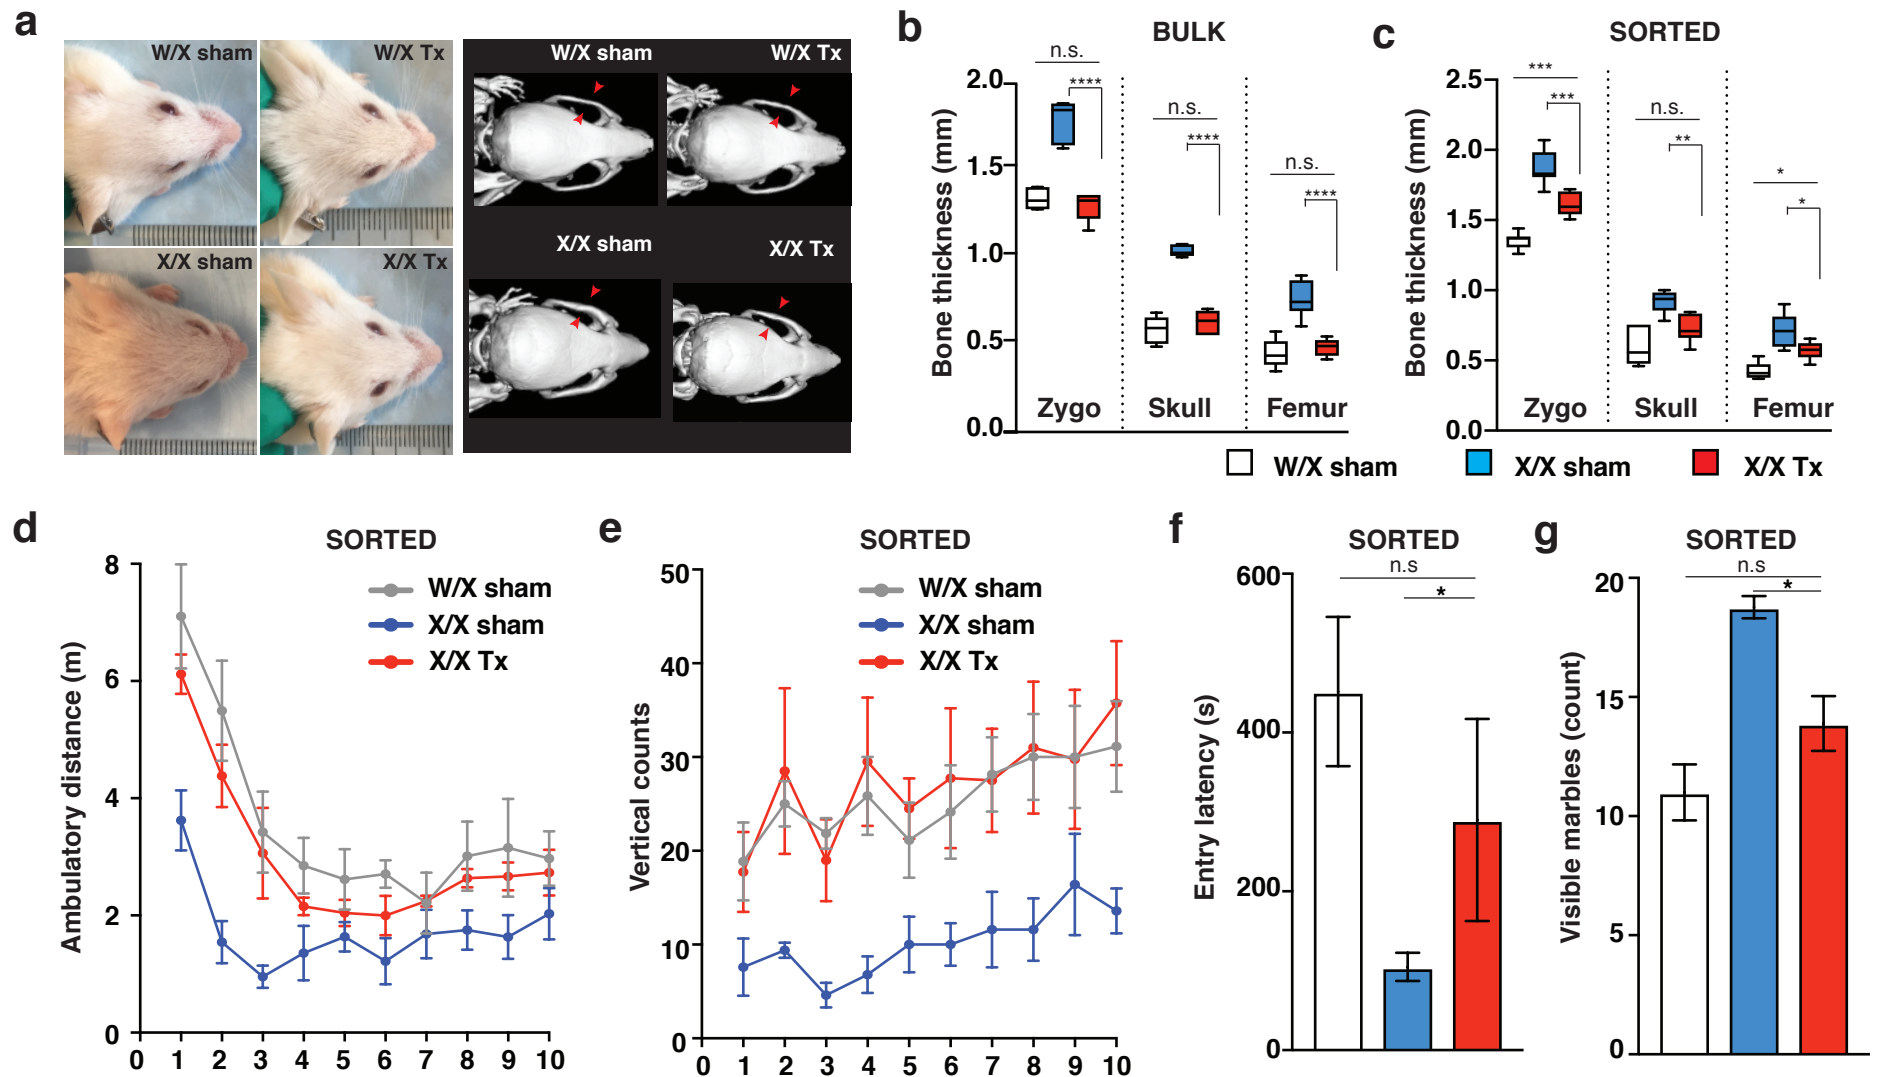

**Fig. 5 | Phenotypic restitution in NSG-IDUA/X mice by human IDUA-HSPCs.** Behavioral and skeletal assessment in: W/X sham (clear or gray, n=11), X/X sham (blue, n=10), and X/X Tx (red, n=11). **a**, Representative photos showing facial features in mice transplanted with bulk cells. **b**, Bony features in mice transplanted with bulk and **c**, sorted cells. Box plots with whiskers show min and max. **d**, Ambulatory distance in mice transplanted with sorted cells. W/X sham vs. X/X sham: \*\*; W/X sham vs. X/X Tx: n.s.; X/X sham vs. X/X Tx: \*. **e**, Vertical rearing in mice transplanted with sorted cells. W/X sham vs. X/X sham: \*; W/X sham vs. X/X Tx: n.s.; X/X sham vs. X/X Tx: \*. **f**, Memory retention in mice transplanted with sorted cells. **g**, Quantification of digging behavior in mice transplanted with sorted cells. Data shown as mean  $\pm$  SEM. **b-g**, Comparisons between groups were performed using one-way ANOVA test and post-hoc comparisons were made with the Tukey's multiple comparisons test. \*:  $p < .05$ , \*\*:  $p < .01$ , \*\*\*:  $p < .001$ , and \*\*\*\*:  $p < .0001$ . Open field testing and vertical rearings were analyzed using within-subject modeling by calculating the area under the curve for each mouse within the first five minutes and comparing between groups with one-way ANOVA.

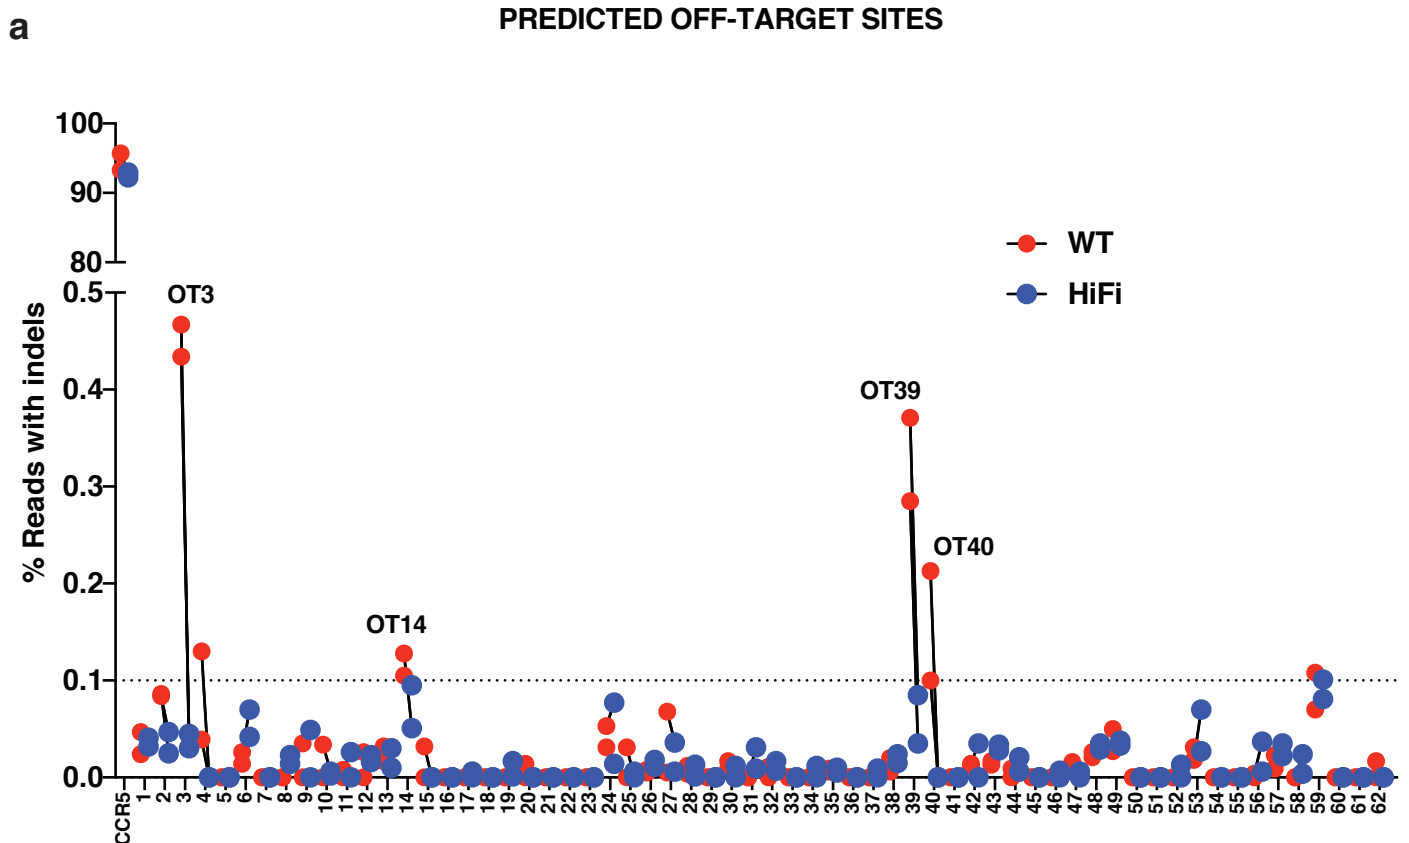

| Target    | Sequence                                        | Closest Gene | Feature    | % Reads With Indels |       |        |        |        |
|-----------|-------------------------------------------------|--------------|------------|---------------------|-------|--------|--------|--------|
|           |                                                 |              |            | Mock                | WT1   | WT2    | HF1    | HF2    |
| CCR5      | GCAGCATAGTGAGCCAGAA <b>GGG</b>                  | CCR5         | Exon       | 0.128               | 93.41 | 95.832 | 92.377 | 93.078 |
| CCR5_OT3  | <b>ACAGA</b> ATAGAGAGCCAGAA <b>AGG</b>          | GRID1        | Intergenic | 0                   | 0.467 | 0.434  | 0.03   | 0.045  |
| CCR5_OT14 | <b>ACAGC</b> ATAG <b>AGG</b> CCAGAA <b>GGG</b>  | SUOX         | Exon       | 0                   | 0.105 | 0.128  | 0.095  | 0.051  |
| CCR5_OT39 | <b>ACAGC</b> ATAGT <b>GAA</b> CCAGGA <b>GGG</b> | TBPL2        | Intergenic | 0.017               | 0.388 | 0.302  | 0.102  | 0.052  |
| CCR5_OT40 | <b>GCT</b> GCATAGT <b>GAA</b> CCAGTA <b>TGG</b> | ZNF609       | Intergenic | 0.032               | 0.122 | 0.245  | 0.031  | 0.014  |

**Fig. 6 | OFF-target analysis of the CCR5 sgRNA. a**, Percent reads with Indels at 62 off-target sites predicted using COSMID. For each site, red dots indicate samples treated with WT Cas9 and blue dots indicate samples treated with HiFi Cas9. The limit of detection for NGS is 0.1% and is indicated on the graph by a dashed line. **b**, Table summarizing four bona fide off-target sites. PAM sequences are shown in red and mismatched bases are shown in blue. For all of these sites the percent of Indels was < 0.5%. For all of these sites, the use of the HiFi Cas9 abolished off-target activity.

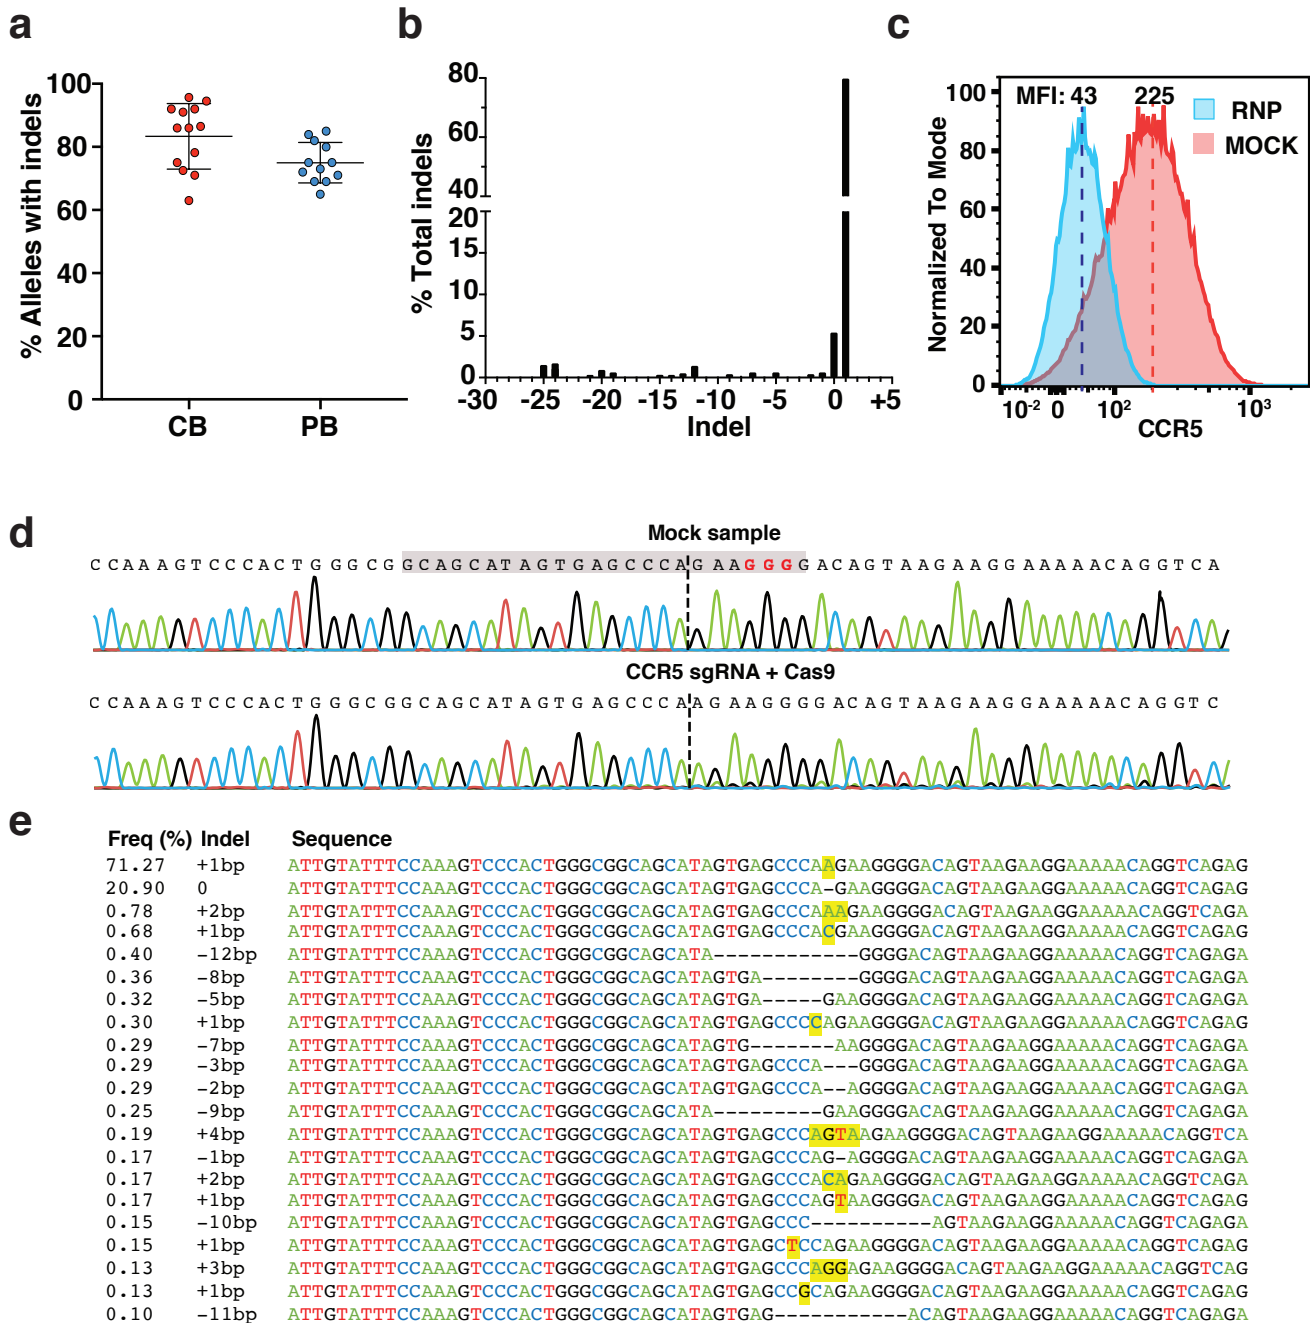

**Extended Data Fig. 1 | Characterization of the *CCR5* sgRNA. a**, Indel frequency in CB and PB-derived cells by the RNP complex. **b**, Representative indel distribution from next generation sequencing reads. **c**, Histogram of *CCR5* protein expression in mock-treated and RNP-treated cells showing an 80% reduction in protein expression after indel induction. **d**, Sample sequence traces around the *CCR5* sgRNA sequence (gray box, PAM in red) in mock samples and RNP-treated CB-derived HSPCs showing predominant single A insertion. **e**, Summary of indels with frequencies greater than 0.1%.

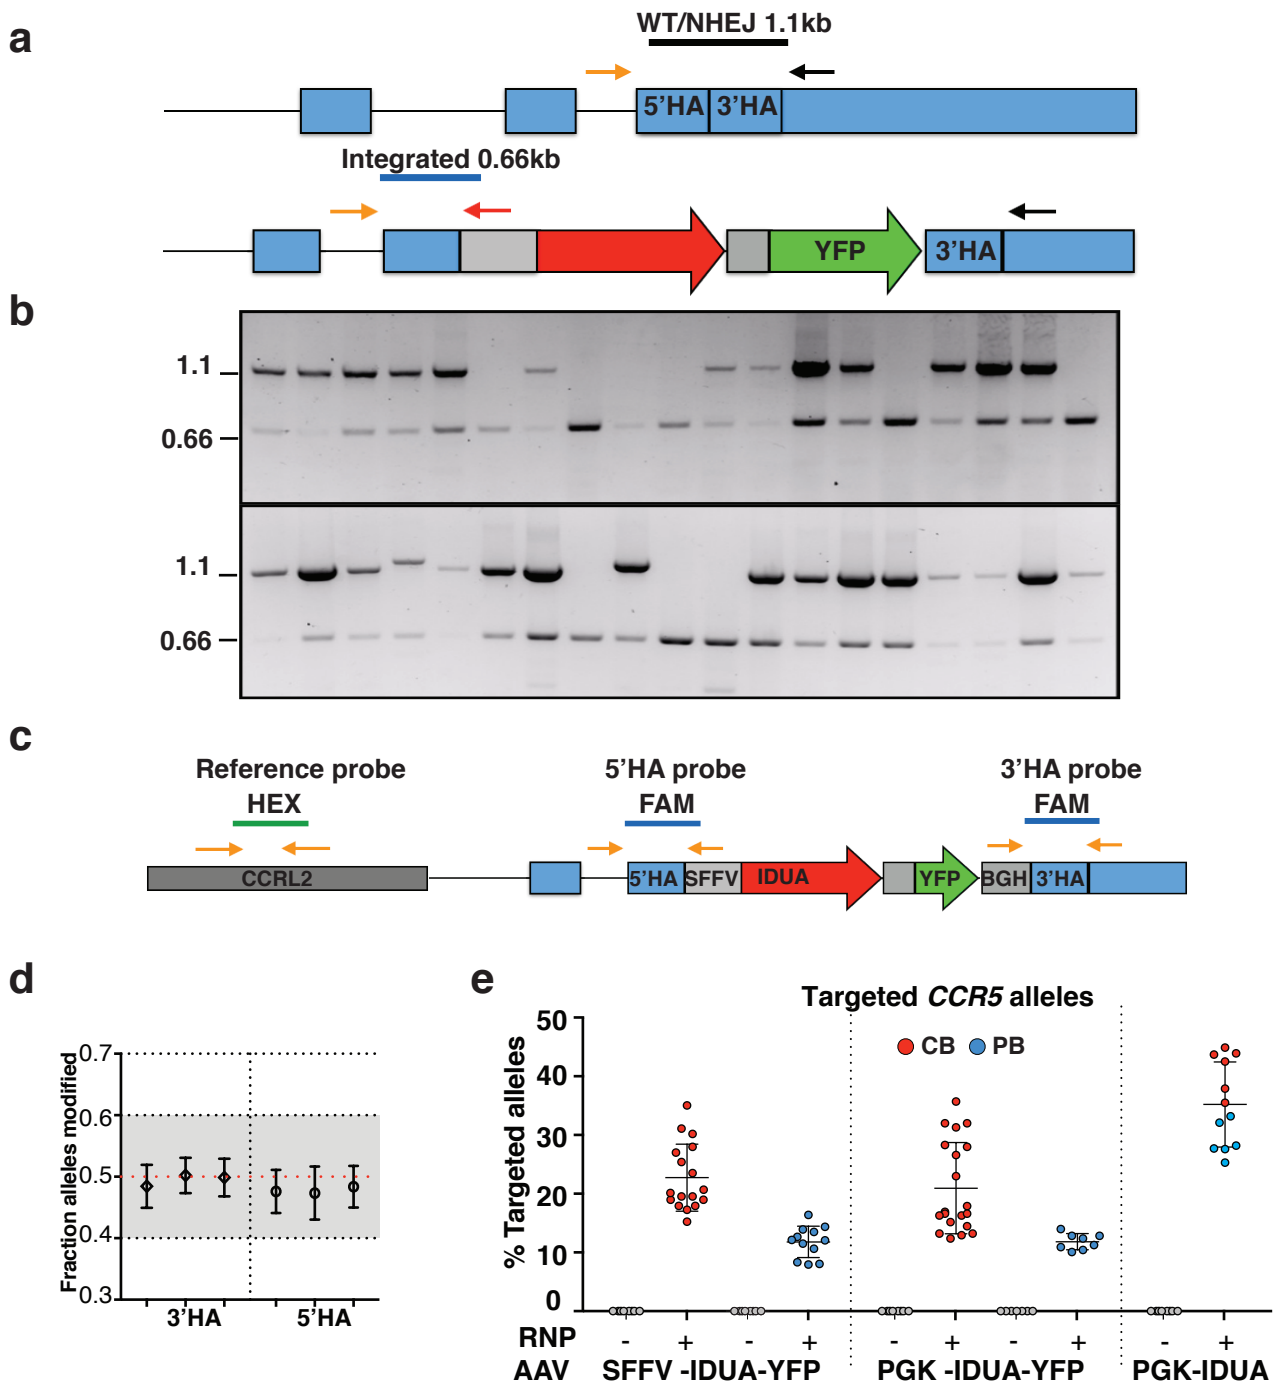

**Extended Data Fig. 2 | Efficiency of modification at the *CCR5* locus.** **a**, Schematic showing the three primer-based genotyping scheme to distinguish mono and bi-allelic integration into the *CCR5* locus on CFA-derived colonies. This strategy did not distinguish WT versus alleles with indels (NHEJ). **b**, Example agarose gels of 40 colonies genotyped in this manner. A single 1.1Kb band was interpreted as WT/NHEJ in both alleles, while a single 0.6 Kb band was read as bi-allelic integration. **c**, Schematic of probe design for ddPCR analysis. Fraction of modified alleles was obtained by using a second reference probe to the *CCRL2* gene also on chromosome 3p. **d**, Originally two probes where each straddled the 5' or 3' homology arm were designed. The accuracy of the assays was verified and compared using genomic DNA from colonies derived from mono-allelic cells (0.5 fraction of alleles modified). Error bars indicate 95% CI. The 3' HA probe was selected. **e**, *CCR5* allele targeting frequencies in CB (red) and PB (blue)-derived IDUA expressing HSPCs as measured by ddPCR.



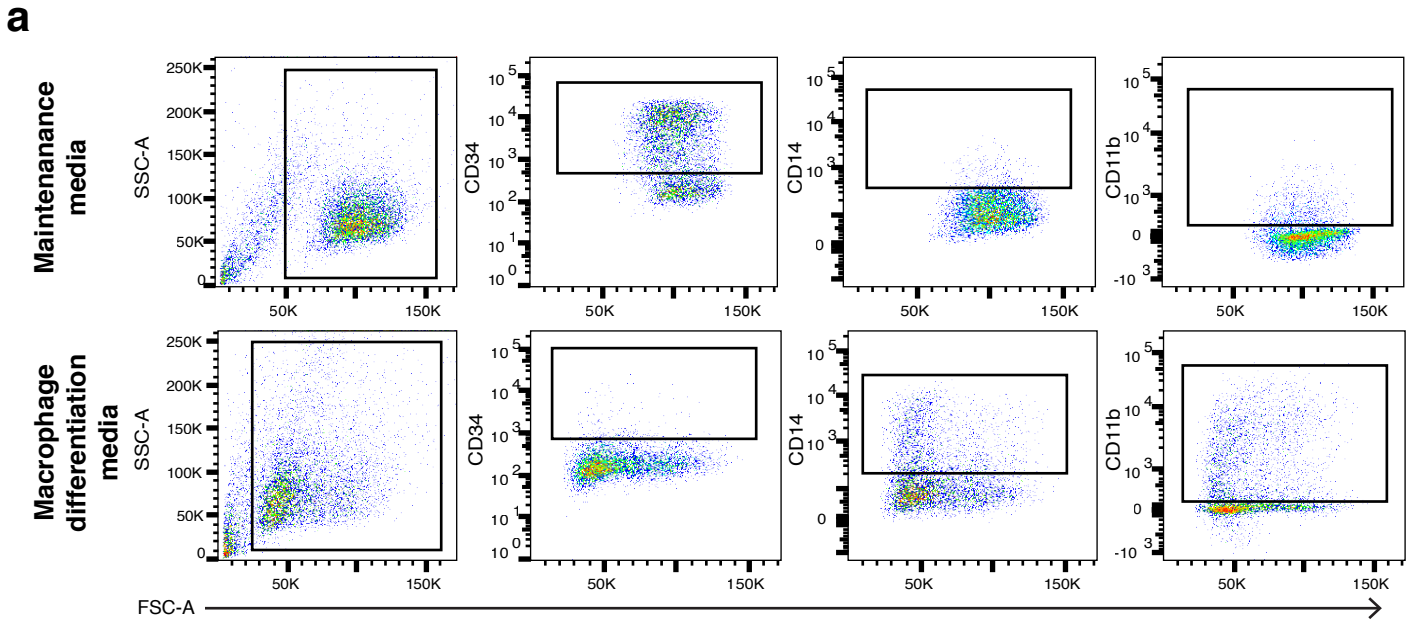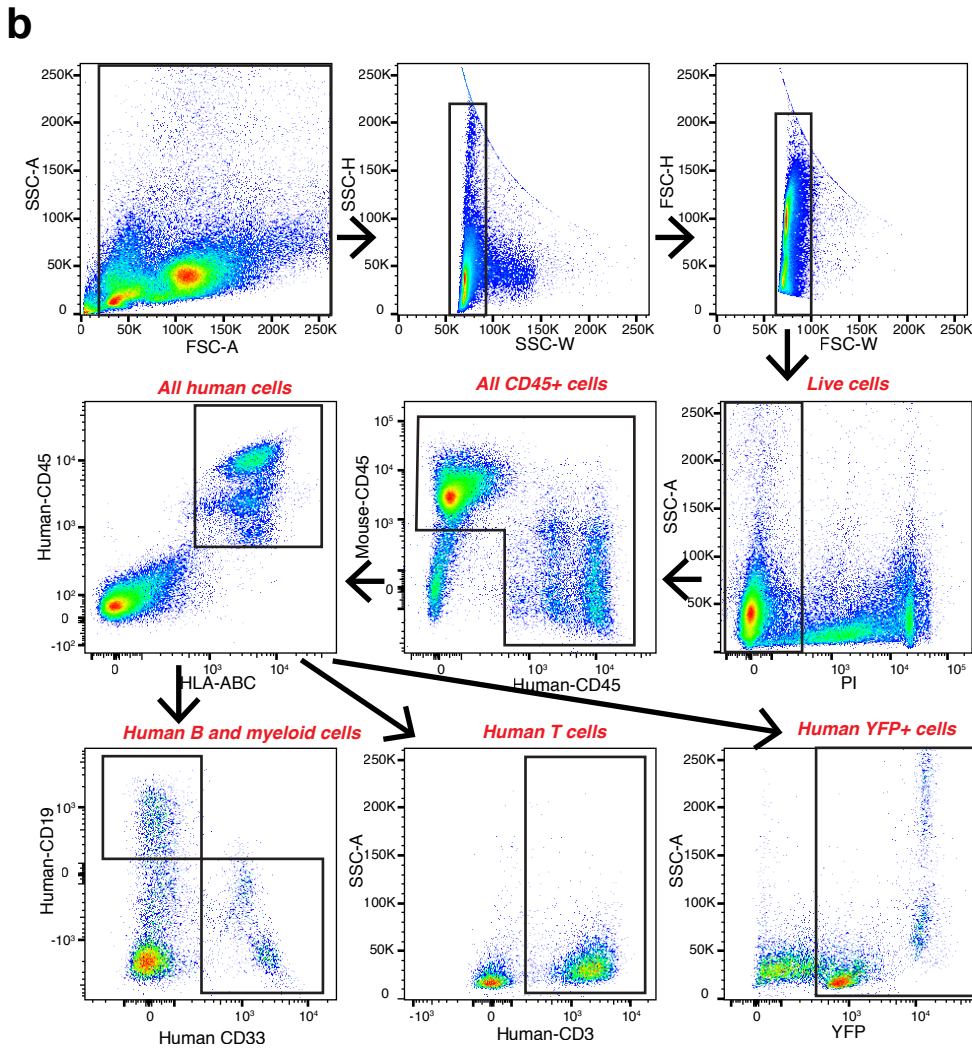

**Extended Data Fig. 3 | a**, Gating scheme for quantification of human CD34+, CD14+, and CD11b+ cells in human HSPCs maintained for 2 weeks in standard CD34+ cytokine media (top panel) or media with M-CSF to induce macrophage differentiation (bottom panel). Single and live cell discrimination not shown.

**b**, Gating scheme used to analyze human cell engraftment and cell lineages after transplantation. Representative plots for quantification of mouse and human hematopoietic (mCD45+ and hCD45+), all human (CD45+/HLA-ABC+), human B (CD19+), human myeloid (CD33+), human T (CD3+), and YFP+ cells.

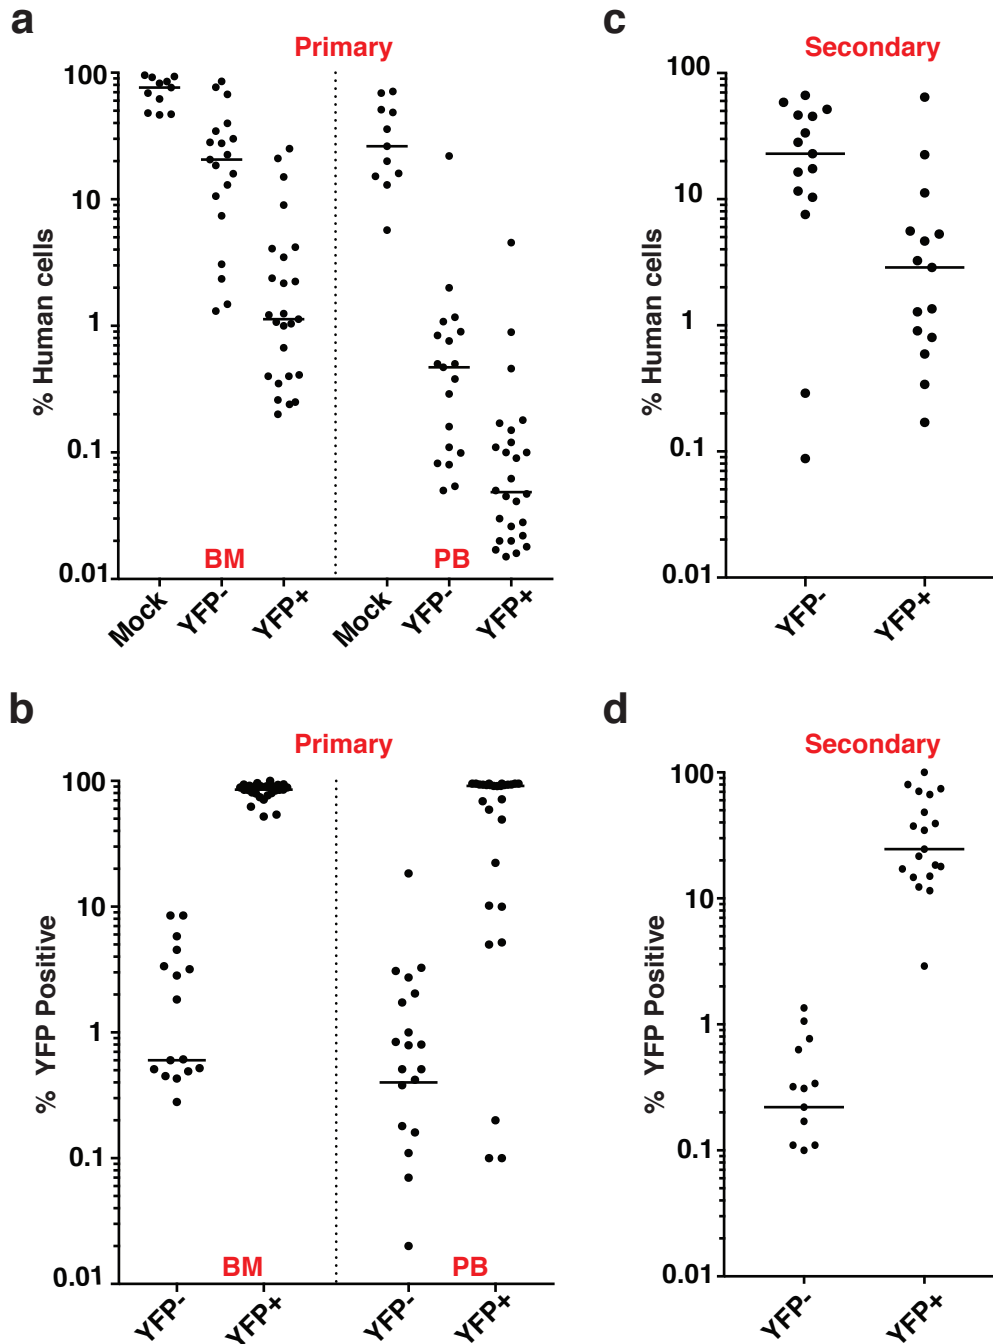

**Extended Data Fig. 4 | IDUA-HSPCs modified with SFFV containing cassettes are capable of long-term repopulation and multi-lineage differentiation.** **a**, Percent human cell chimerism in BM and PM of mice 16-weeks post-transplant with CB-derived HPSCs. mock (n=11), YFP- (n=19), and YFP+ (n=25). Each point represents a mouse. **b**, Percent YFP+ cells in BM and PB of mice in primary transplants. **c**, Percent human cell chimerism in BM of mice in secondary transplants (32 weeks). **d**, Percent YFP+ cells in BM and PB of mice in secondary transplants. Medians shown.

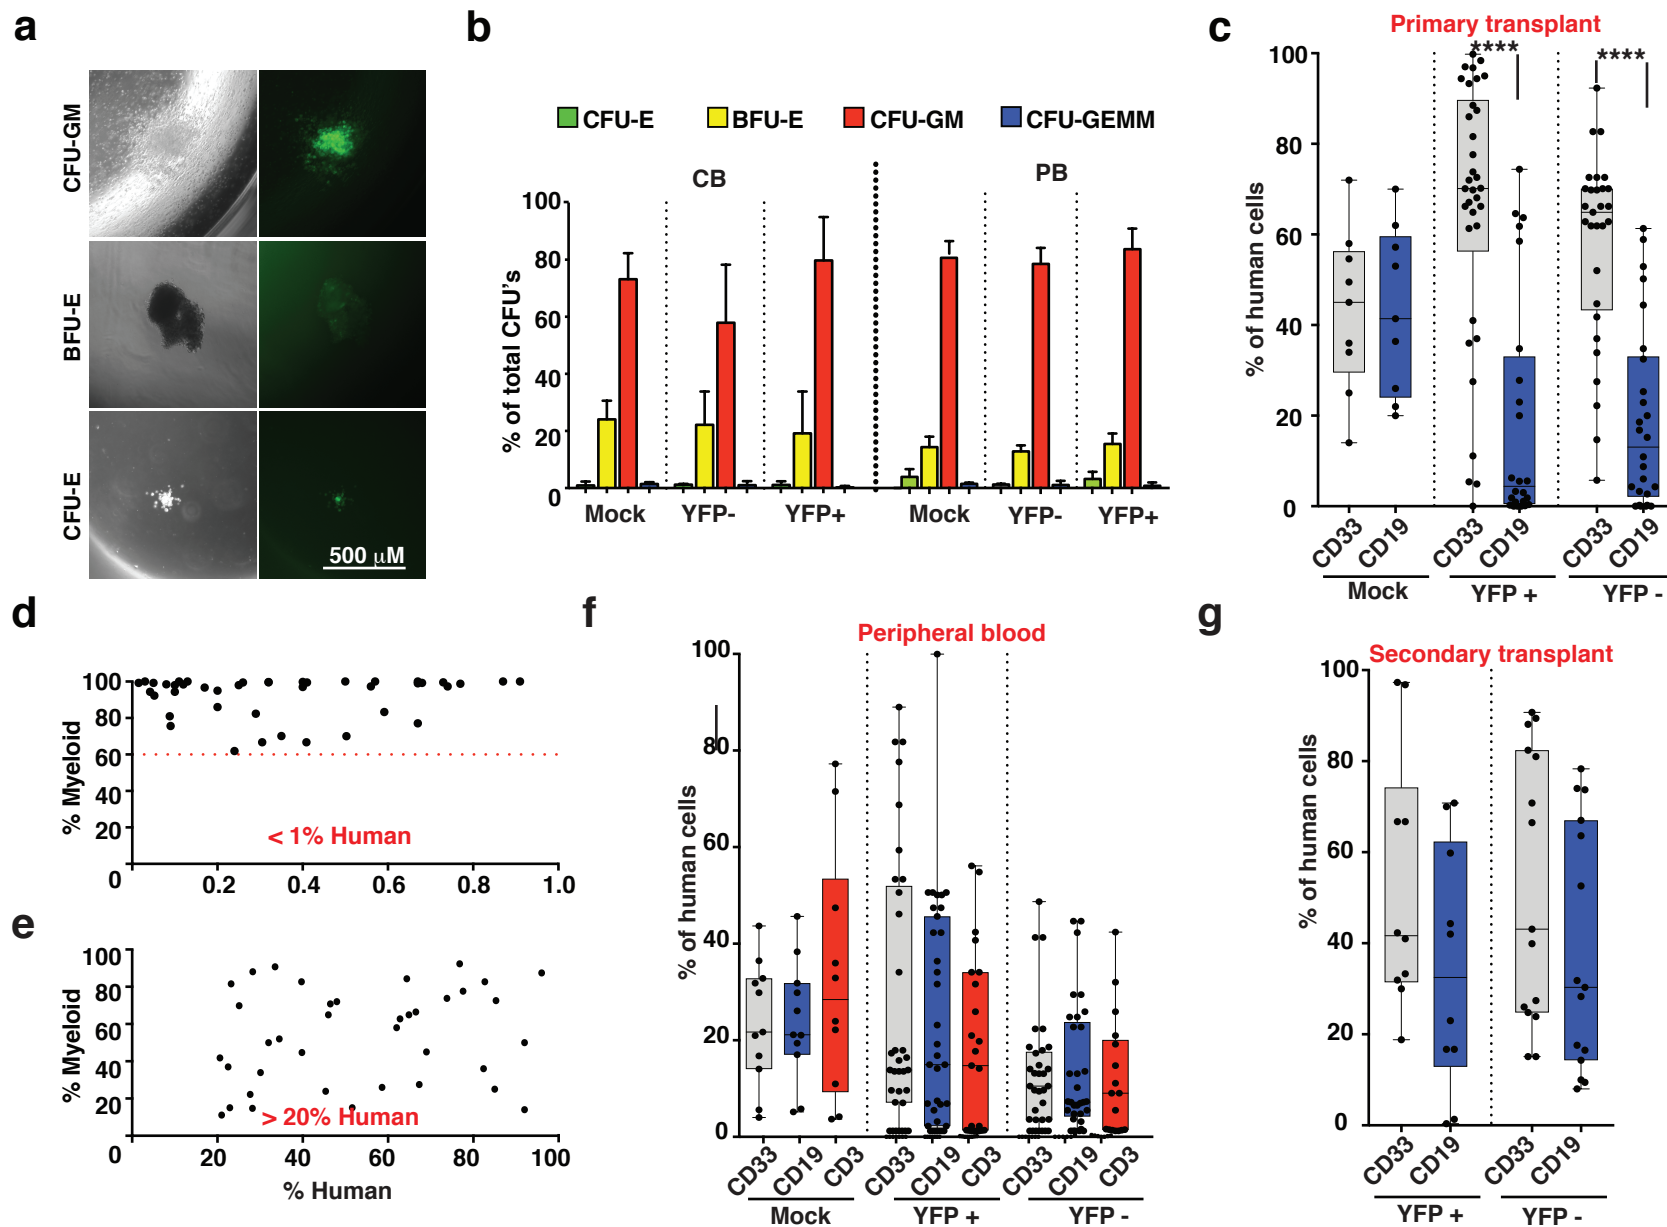

**Extended Data Fig. 5 | IDUA-HSPCs maintain multi-lineage differentiation potential.** **a**, Representative photos showing morphology and YFP expression in CFU-GM, BFU-E, and CFU-E colonies in CFAs. **b**, Colony formation unit frequency in mock, YFP- and YFP+ cells. **c**, Box plot with whiskers (min to max) showing percent human CD33+ (myeloid), CD19+ (B) cell in the BM of mice transplanted with mock, and FAC-sorted YFP+ and YFP- cells in primary transplant mice. Each point represents data from a single mouse. **d**, Scatter plot from mice with human cell chimerism <1% against the percent myeloid cells. **e**, Scatter plot of human cell chimerism >20% against the percent myeloid cells. **f**, Percent human CD33+, CD19+, and CD3+ (T) cells in the PB of mice transplanted with mock, and FAC-sorted YFP+ and YFP- cells. **g**, Box plot with whiskers (min to max) showing percent human CD33+ (myeloid), CD19+ (B) cell in the BM secondary transplant mice. \*\*\*\*:  $p < .0001$  -in one-way ANOVA test. Post hoc comparisons were made with the Tukey's multiple comparisons test.

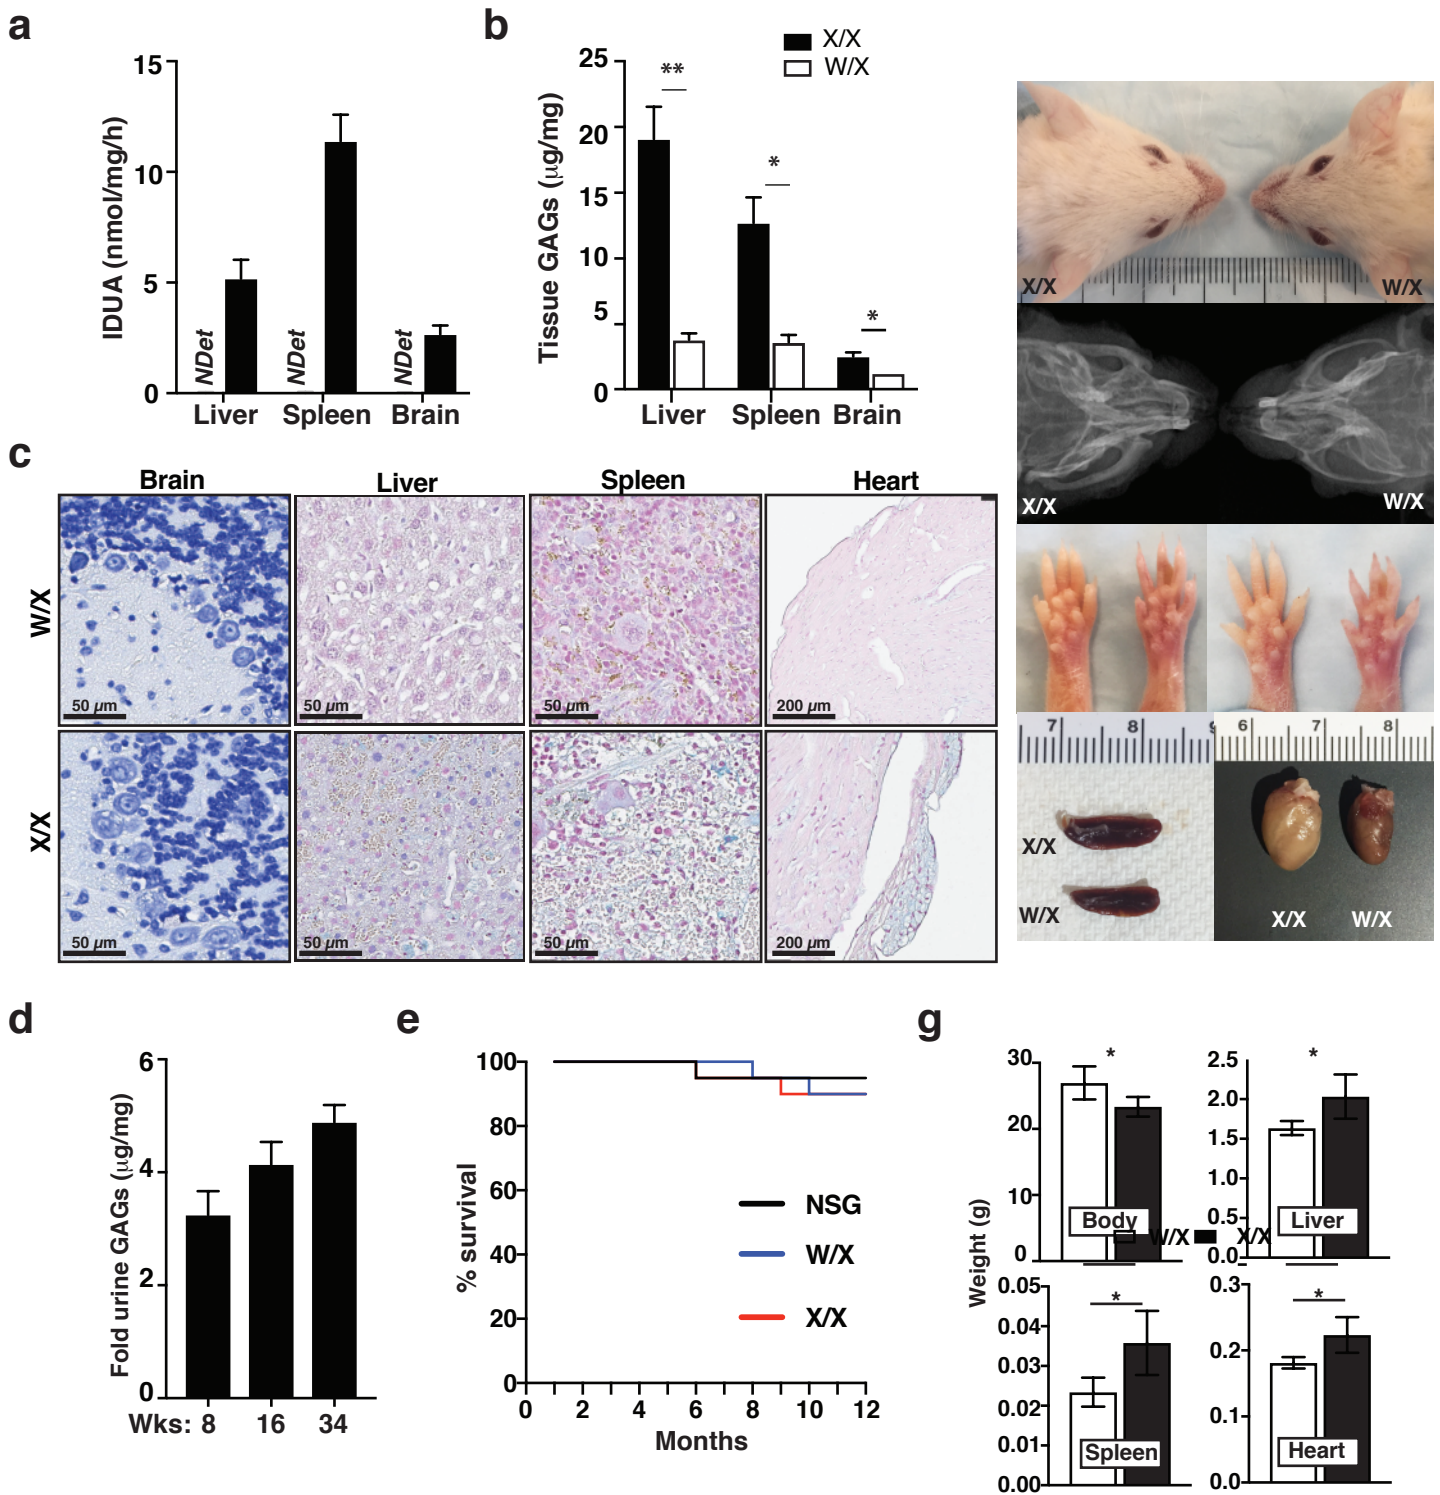

**Extended Data Fig. 6 | Biochemical characterization of NSG-IDUAX/X mice.** **a**, Tissue IDUA enzyme activity in tissues. **b**, Tissue GAGs measure by dimethylmethylene blue reactivity. **c**, Histological sections of paraffin-embedded tissues stained with bromophenol blue (brain) or alcian blue (liver, spleen, and heart). Brain sections on X/X mice showed distended and vacuolated Purkinje cells. In liver, spleen, and heart blue deposit-laden cells can be seen throughout. **d**, Age-related progression of urinary GAGs excretion. **e**, Survival analysis comparing NSG, W/X, and X/X during one year of observation (n=10). **f**, Physical dysmorphisms and visceral enlargement. **g**, Total body, liver, spleen and heart weight in W/X and X/X mice

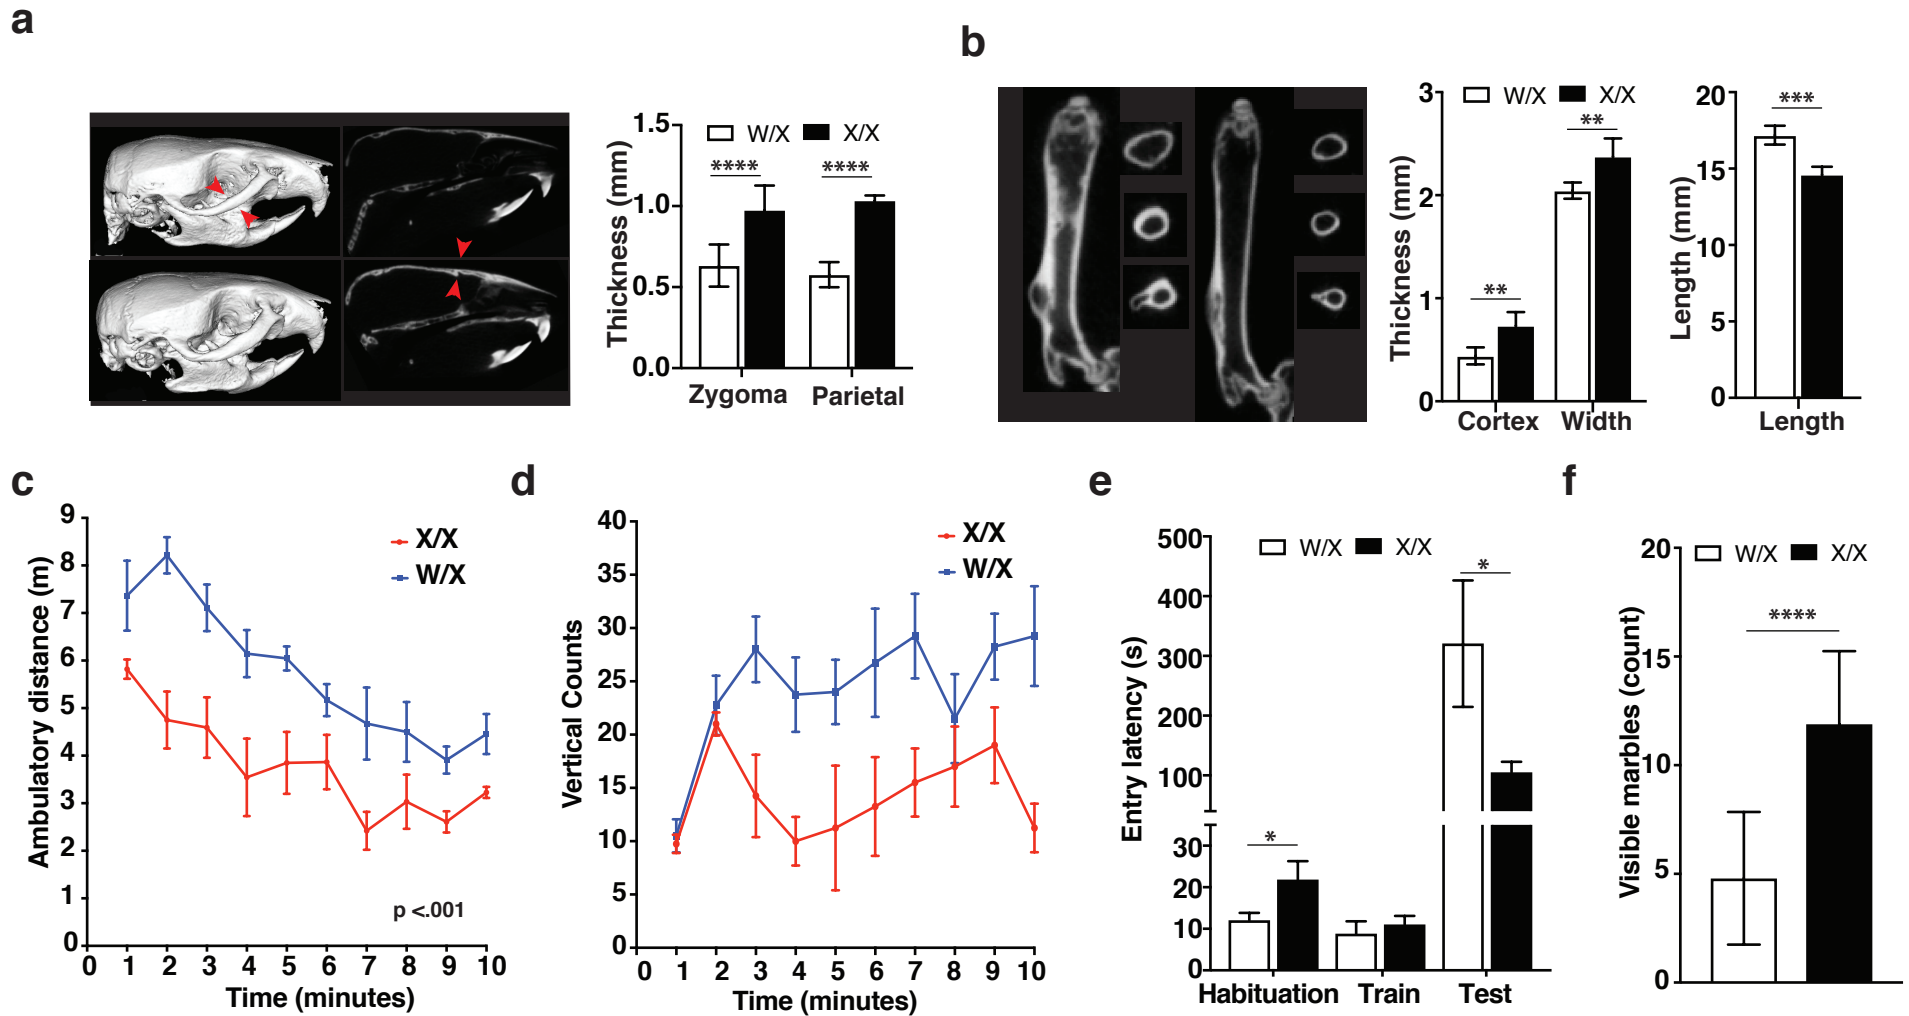

**Extended Data Fig. 7 | Phenotypic characterization of NSG-IDUAX/X mice.** **a**, Reconstructed micro-CT images of skull and zygomatic and parietal bone thickness. **b**, CT longitudinal sections of femurs, and cortical thickness, width, and length measurements. **c**, Spontaneous locomotion in open field testing. **d**, Vertical rearing counts for W/X and X/X mice during 10-minute observation in the open field chamber. **e**, Long-term memory in passive inhibitory avoidance test. **f**, Defensive digging in the marble burying task. Total 5 female mice per genotype. Data are presented as mean  $\pm$  SD for a-e, mean  $\pm$  SEM for f-g. Comparisons between groups were performed using unpaired t-test. \*:  $p < .05$ , \*\*:  $p < .01$ , \*\*\*:  $p < .001$ , and \*\*\*\*:  $p < .0001$ . Open field testing was analyzed using within-subject modeling for the entire time course by calculating the area under the curve for each mouse and comparing between genotypes with a t-test.

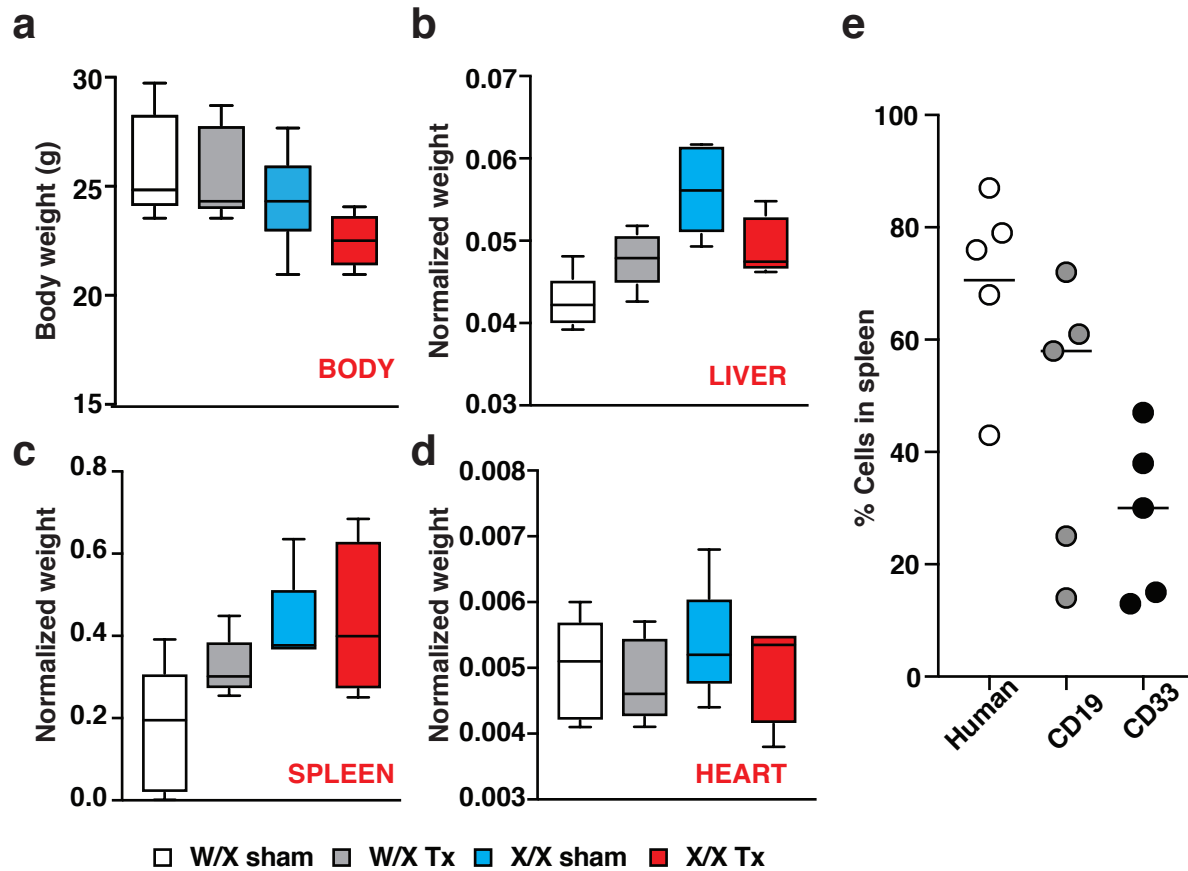

**Extended Data Fig. 8** | Body and organ size in transplantation experiments using bulk IDUA-HSPCs. **a**, Total body weight in heterozygous transplanted (W/X Tx- dark gray), heterozygous sham-treated (W/X sham- clear), homozygous transplanted (X/X Tx- red), and homozygous sham-treated (X/X Tx- blue) mice. **b**, Normalized liver weight. **c**, Normalized spleen weight. **d**, Normalized heart weight. **e**, Percent human, B (CD19+), and myeloid (CD33+) cells in the spleen of X/X Tx mice measured 18 weeks post-transplant.

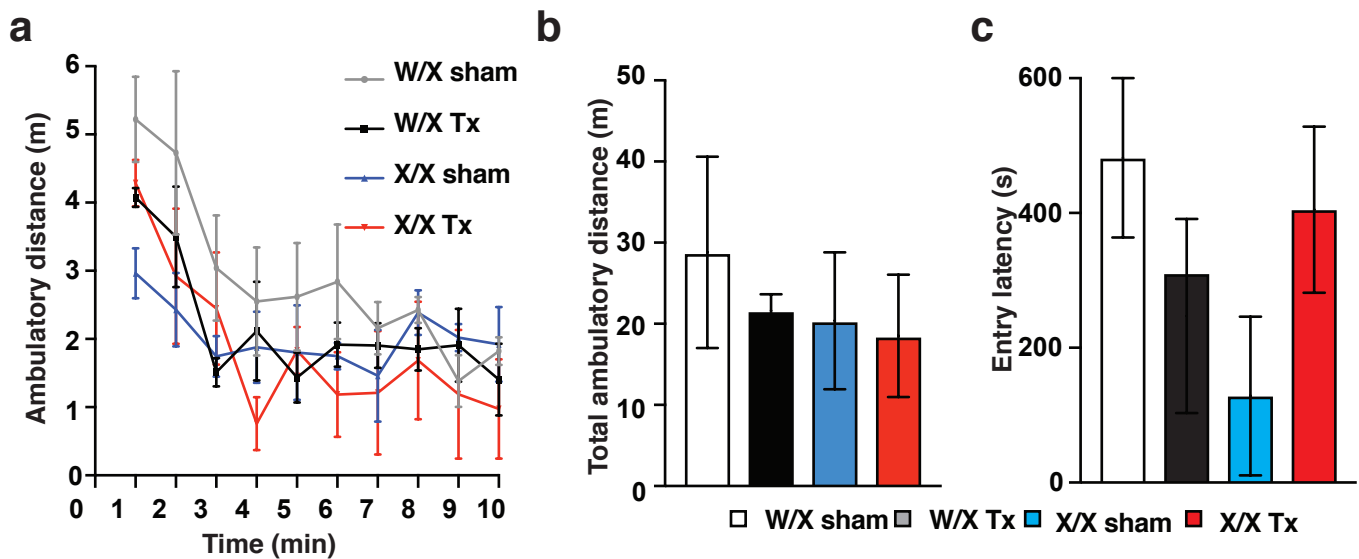

**Extended Data Fig. 9 | Neurobehavioral studies in mice transplanted with bulk IDUA-HSPCs. a**, 10-minute time course of spontaneous locomotor behavior in heterozygous transplanted (W/X Tx-black), heterozygous sham-treated (W/X sham- celar or gray), homozygous transplanted (X/X Tx- red), and homozygous sham-treated (X/X Tx- blue) mice. No comparison was found to be significant. **b**, Total ambulatory distance in 10 minutes. **c**, Memory for inhibitory avoidance training (24h). No comparison was found to be significant. Comparisons between groups were performed using one-way ANOVA test and post-hoc comparisons were made with the Tukey's multiple comparisons test. Open field testing and vertical rearings were analyzed using within-subject modeling by calculating the are under the curve for each mouse for the entire time course and comparing between groups with one-way ANOVA.
